# Supplementary material for: CD133 Stimulates Cell Proliferation via the Upregulation of Amphiregulin in Melanoma
Source: MDPI journal article supplement (doi:10.3390/cells13090777), 2024-05-02
Supplement: s1 [file s1]

Simbulan-Rosenthal *etal. Cells* 2024

Supplementary Figures

Figure S2

Full Gel Images

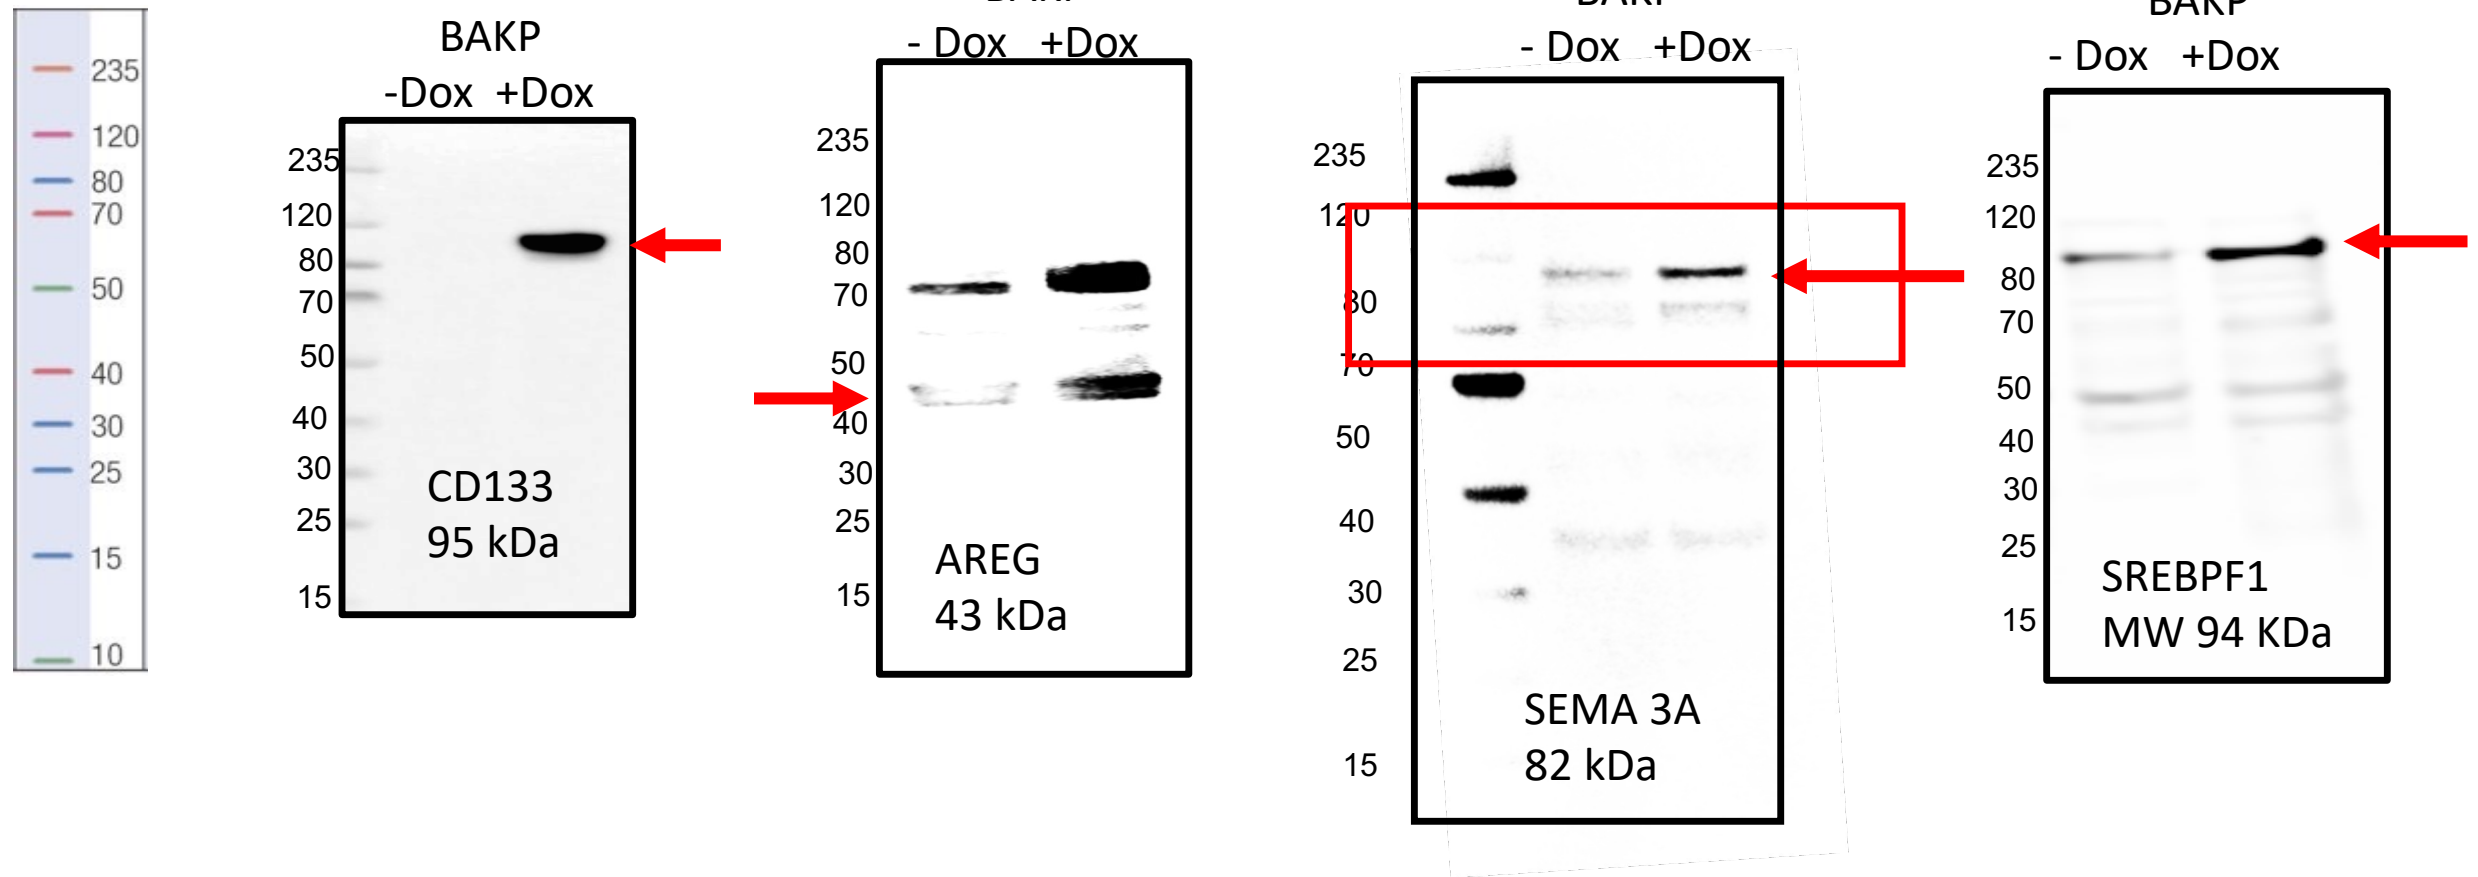

Figure S2a, The original image of Western Blot in Figure 2B.

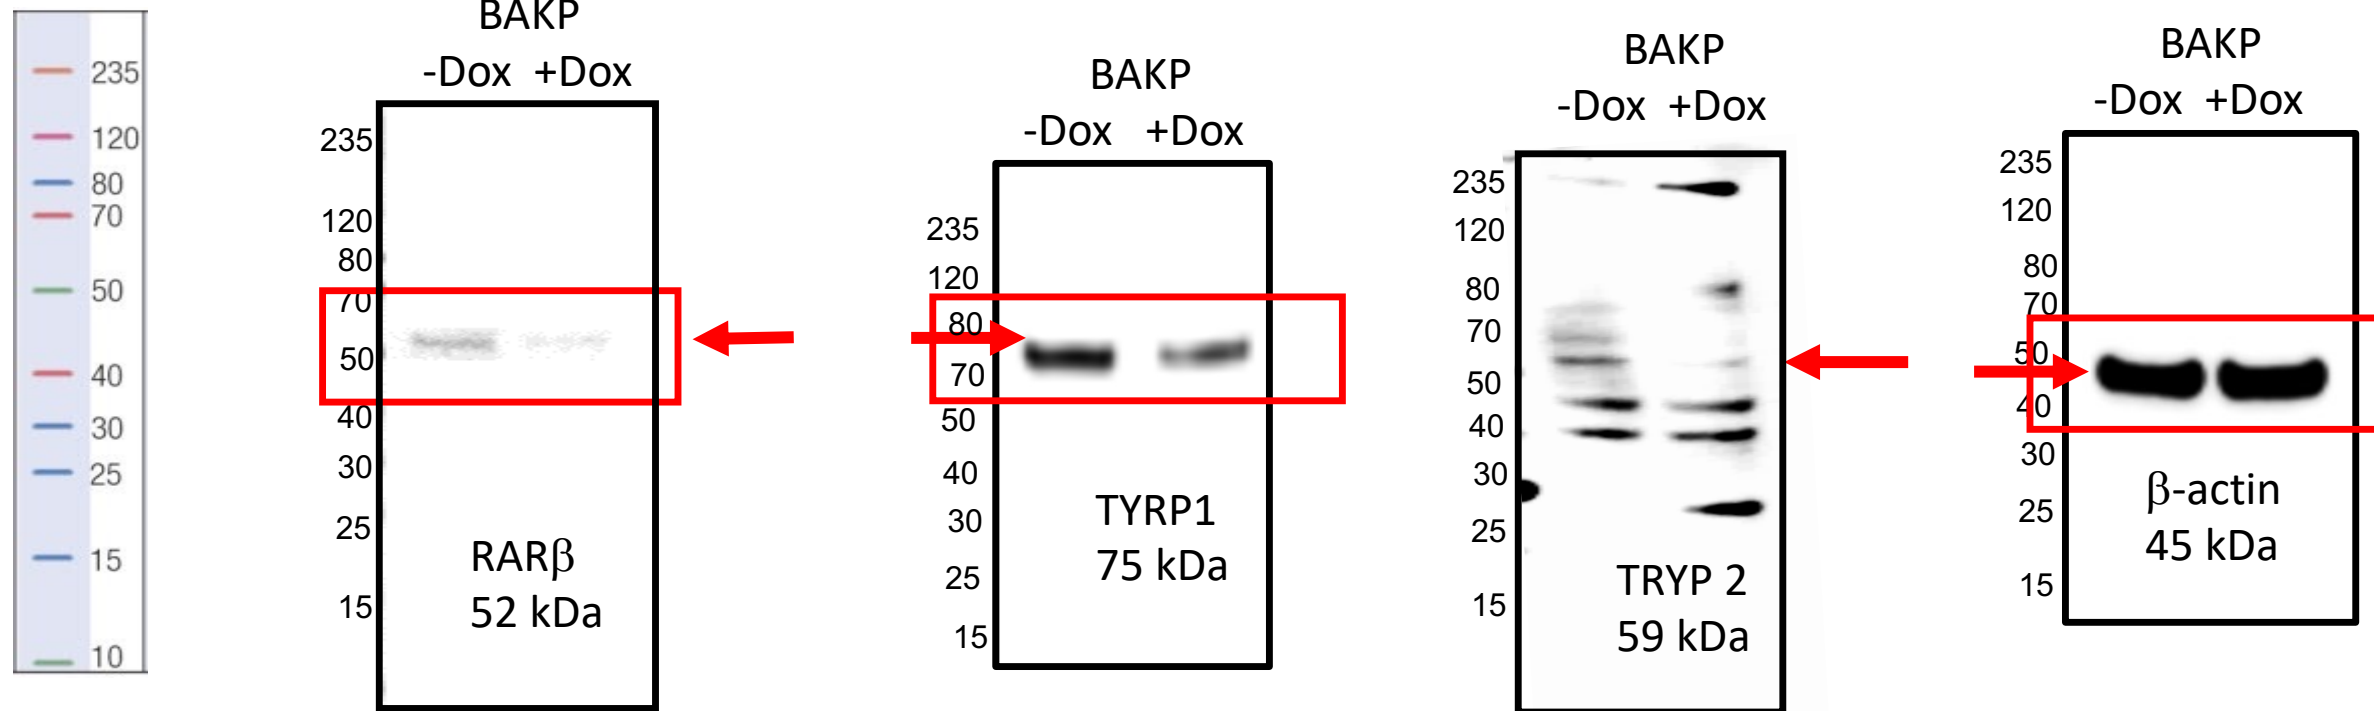

**Figure S2a, The original image of Western Blot in Figure 2B.**

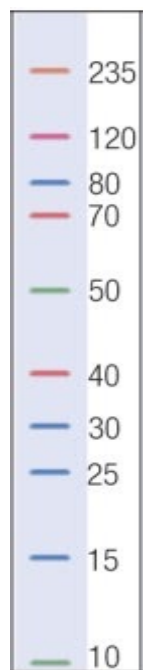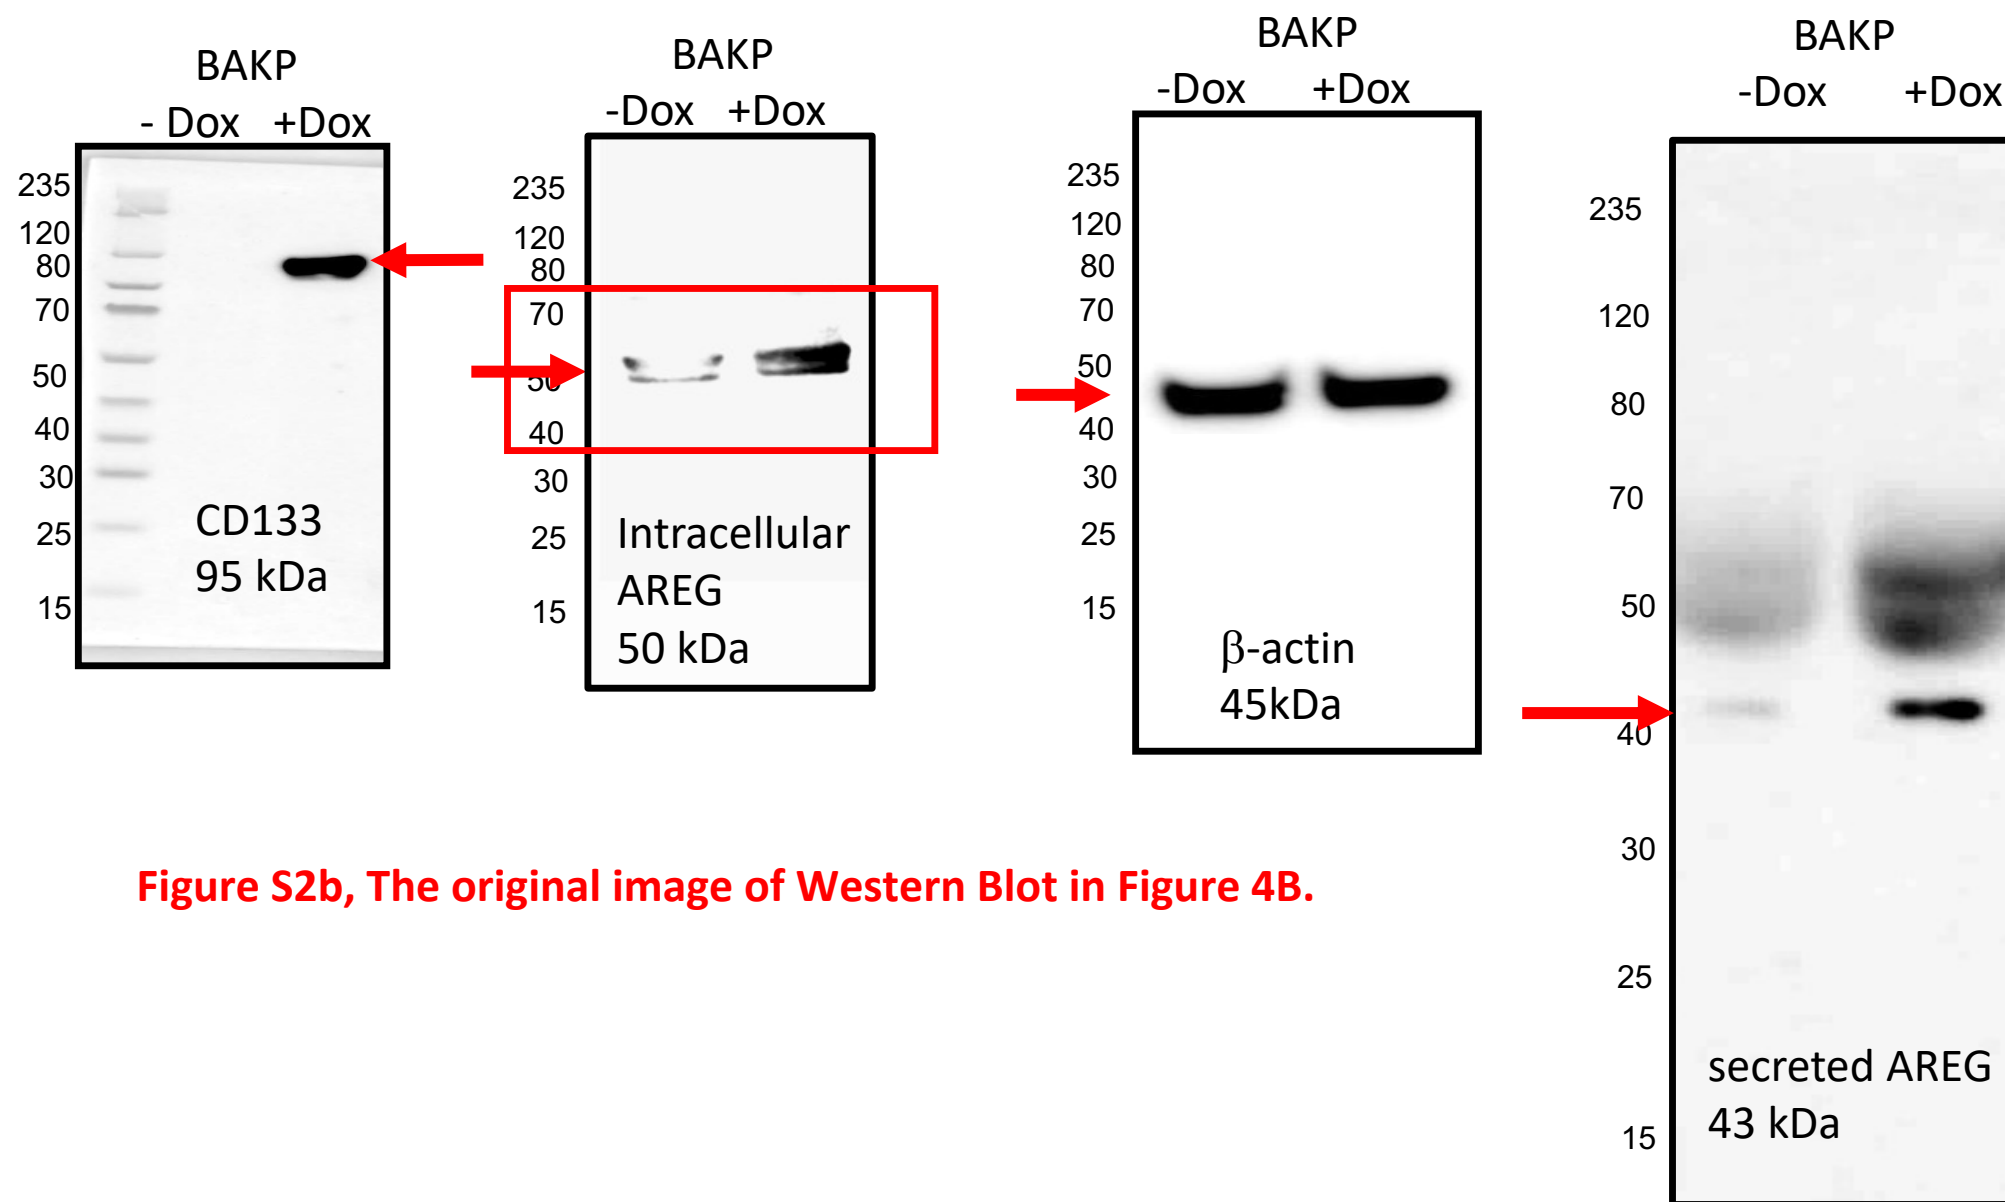

Figure S2b, The original image of Western Blot in Figure 4B.

Figure 4C

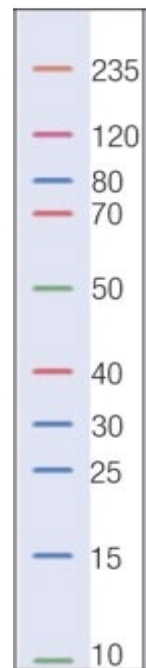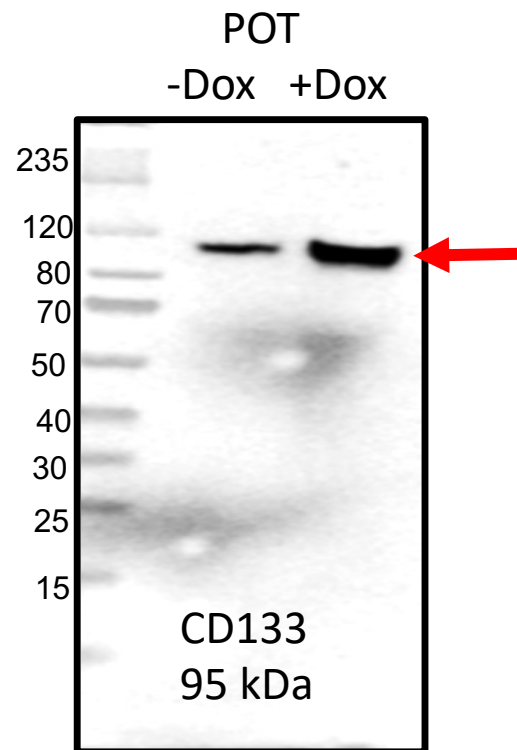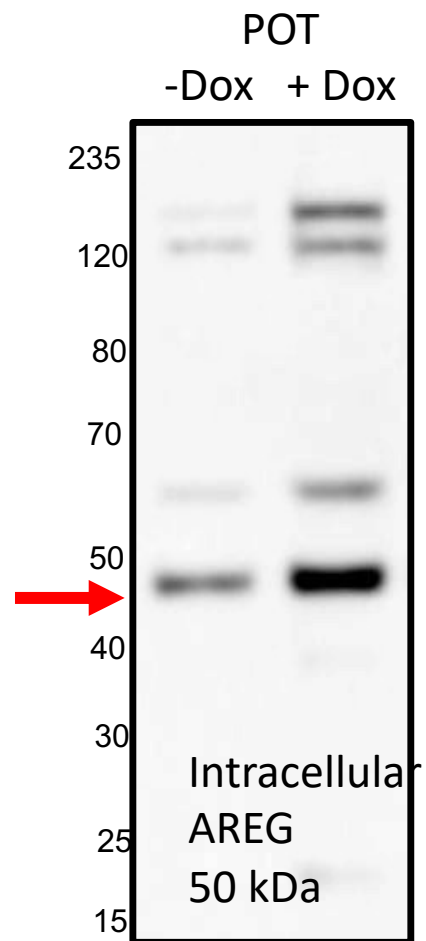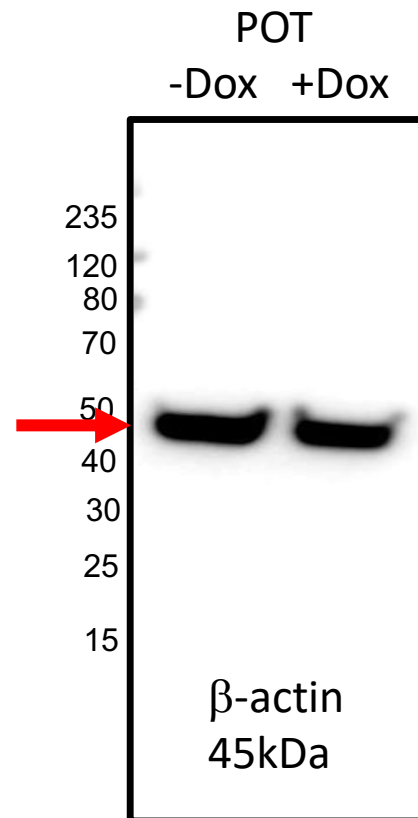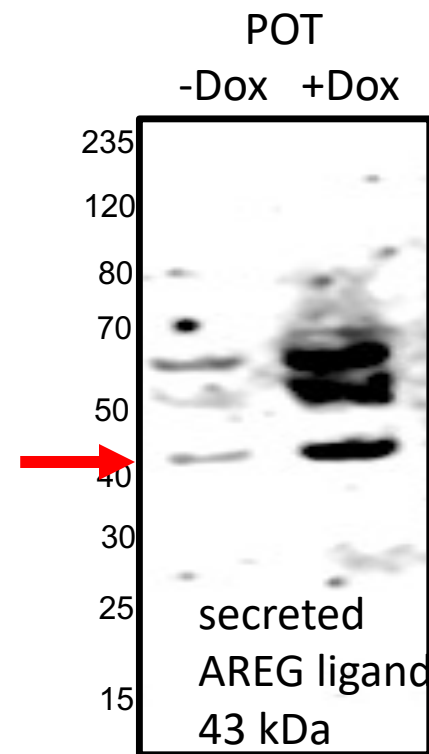

**Figure 5C**

**Figure S2c, The original image of Western Blot in Figure 5B, 5C.**

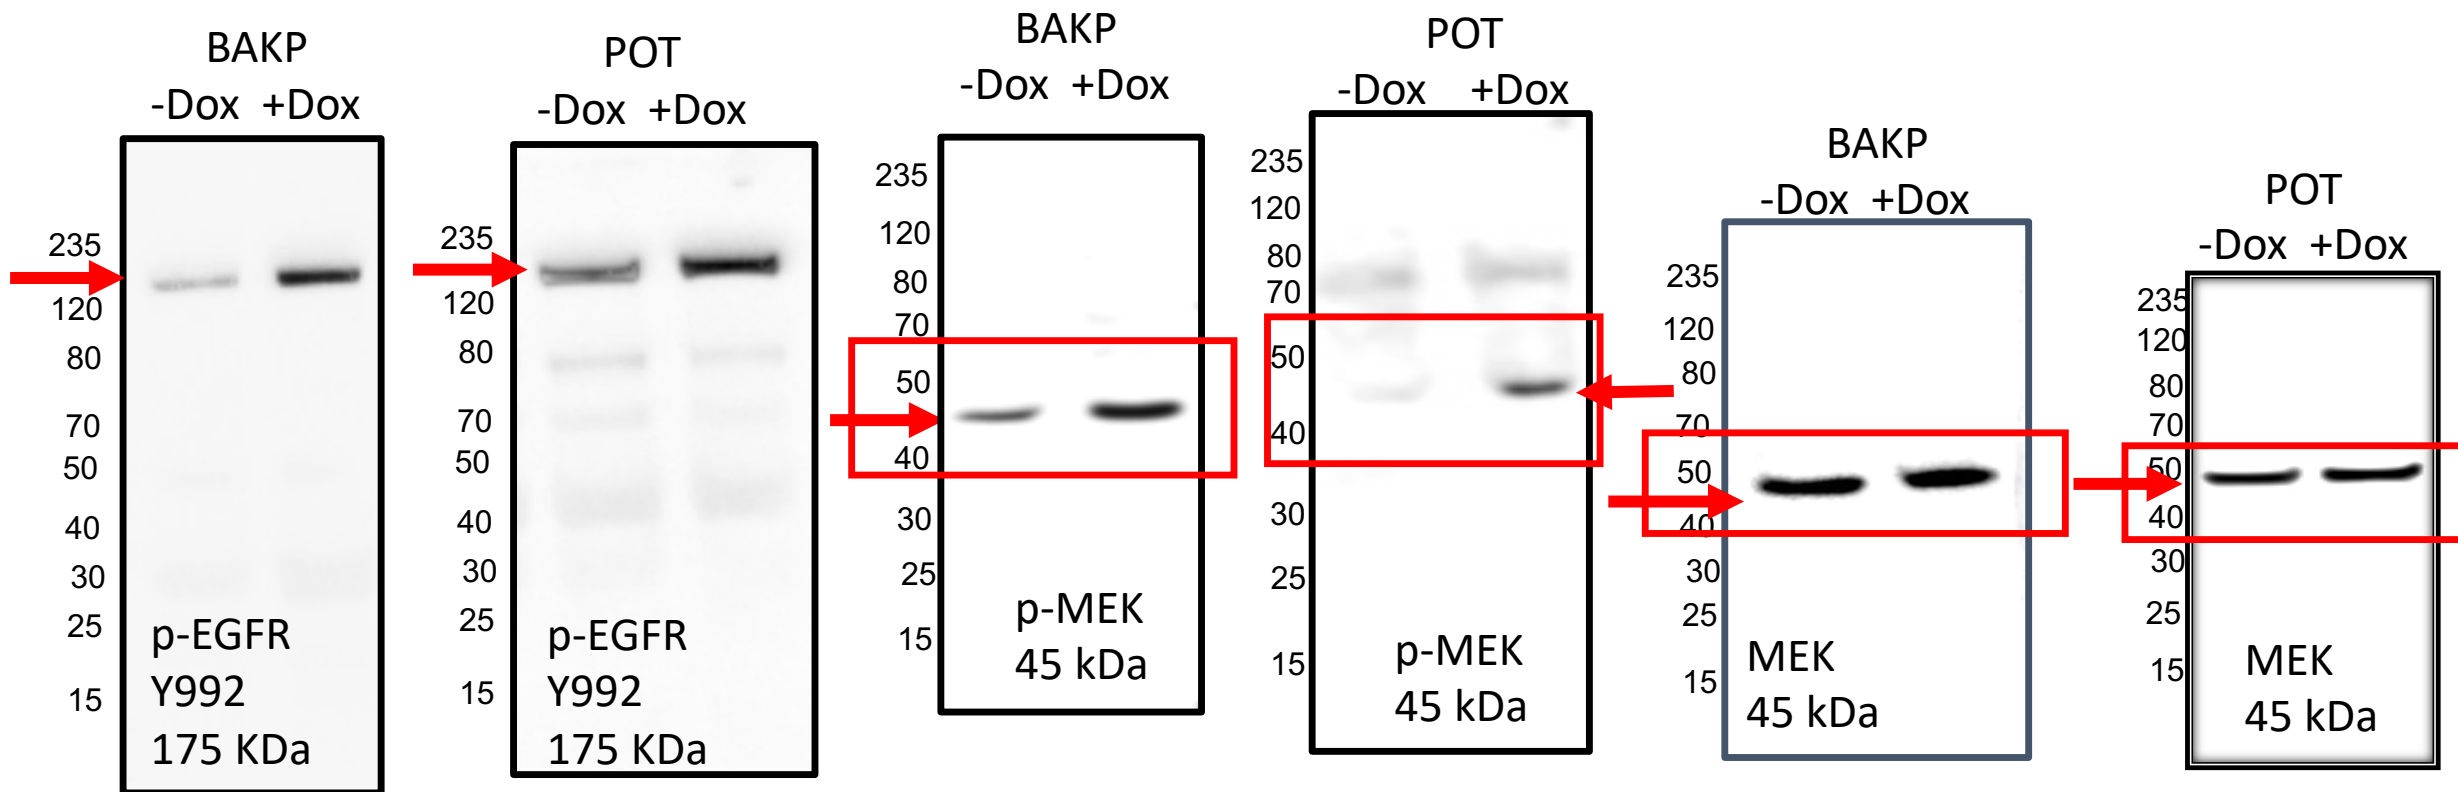

Figure S2d, The original image of Western Blot in Figure 8A.

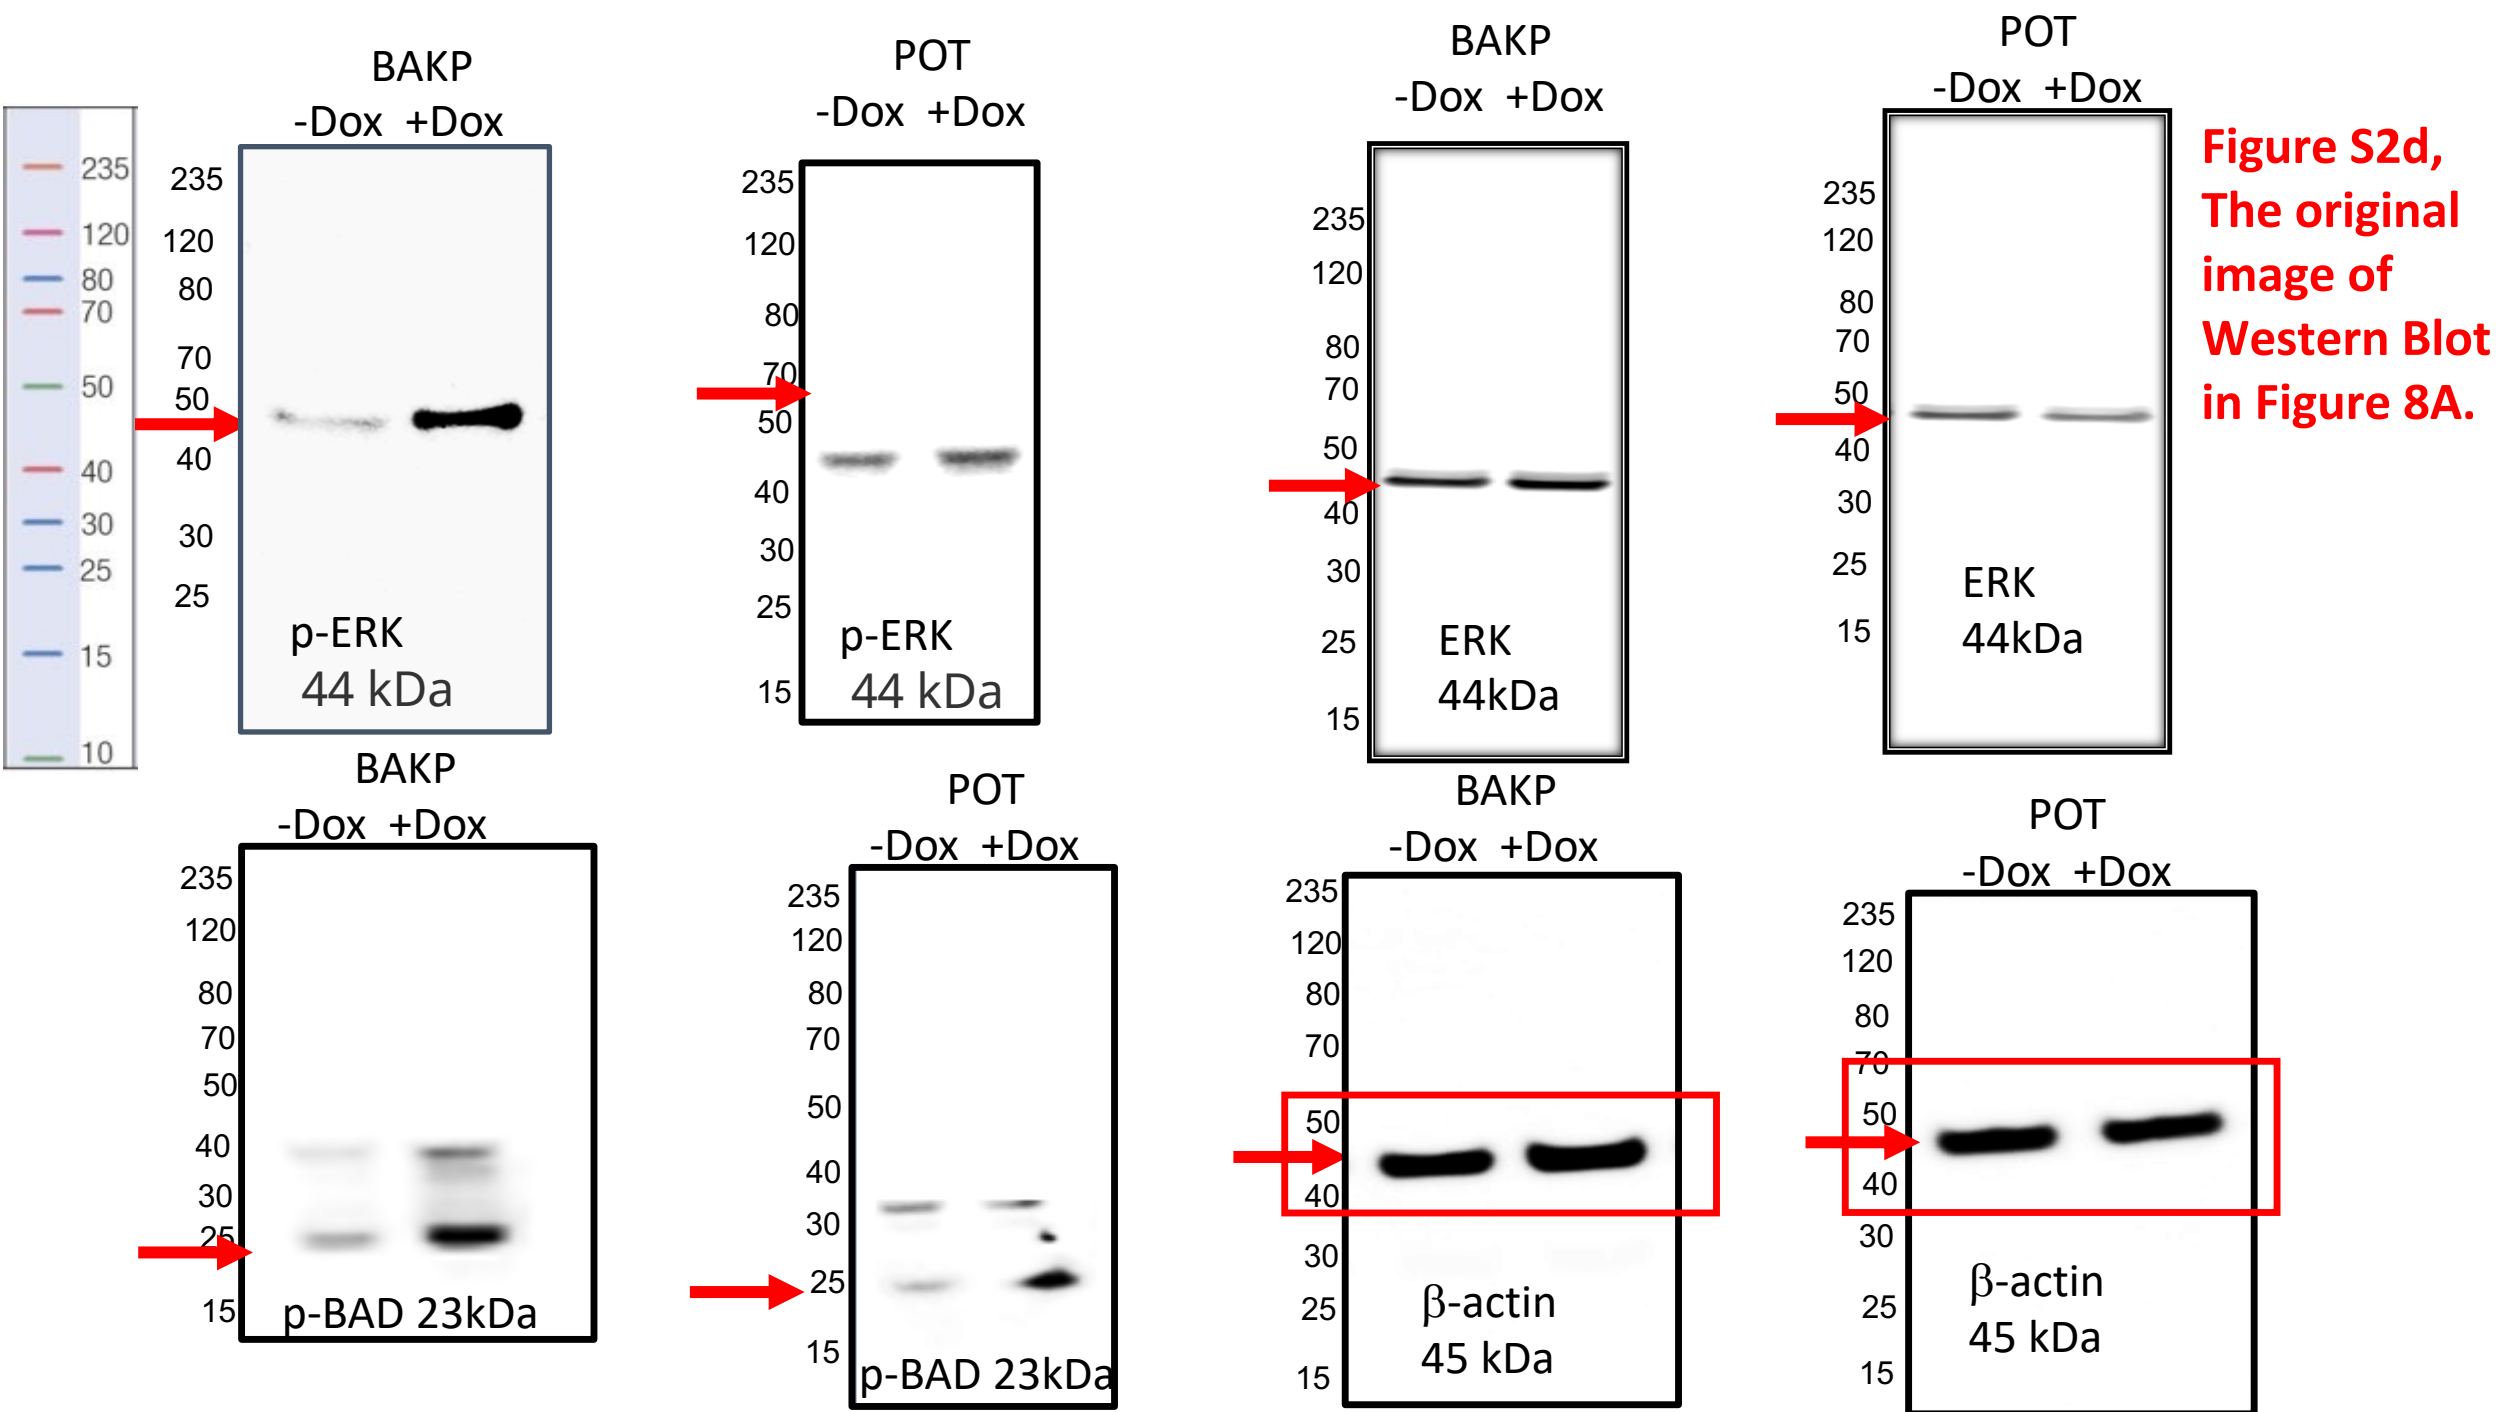

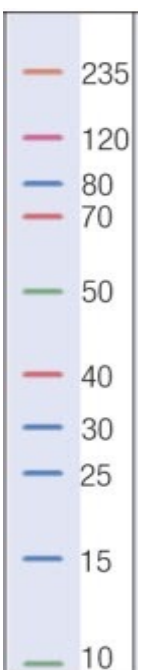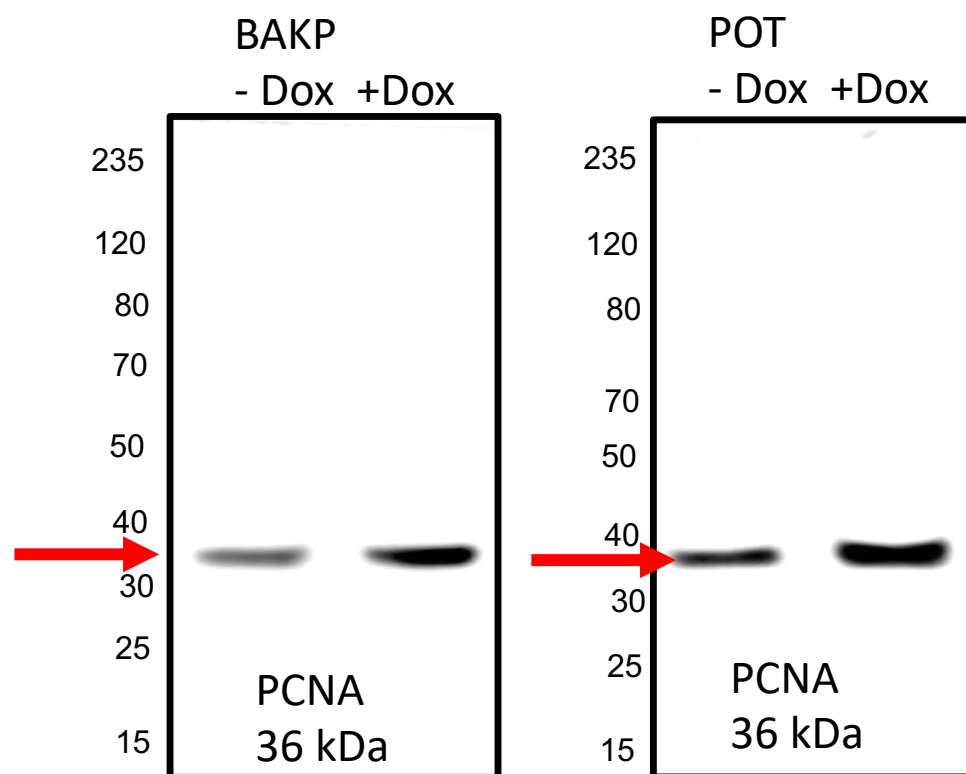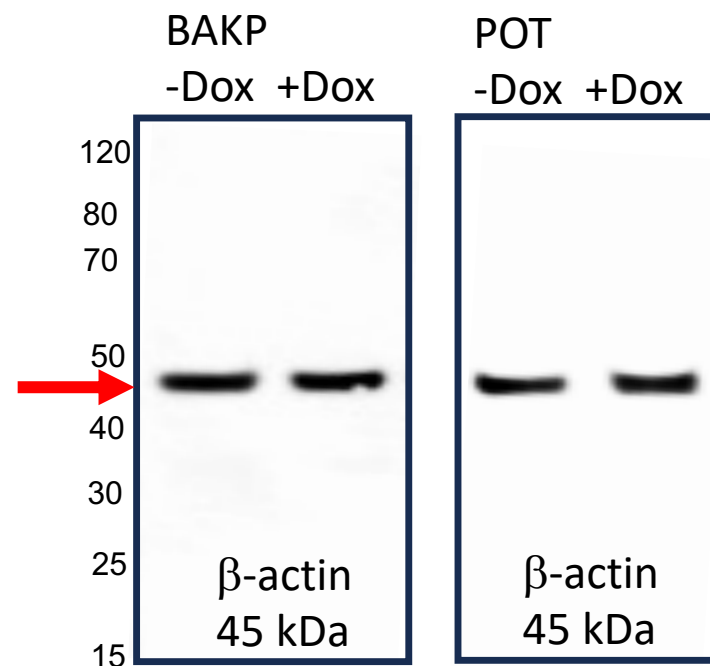

Figure S2e, The original image of Western Blot in Figure 8B.



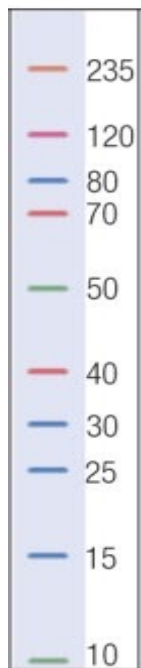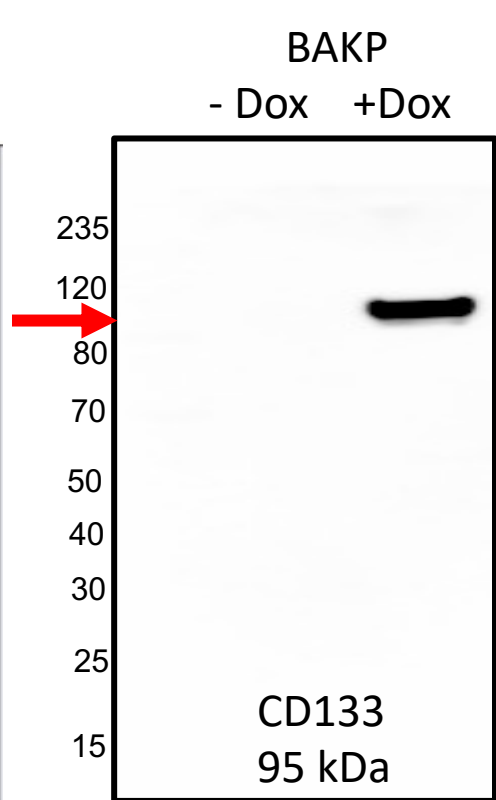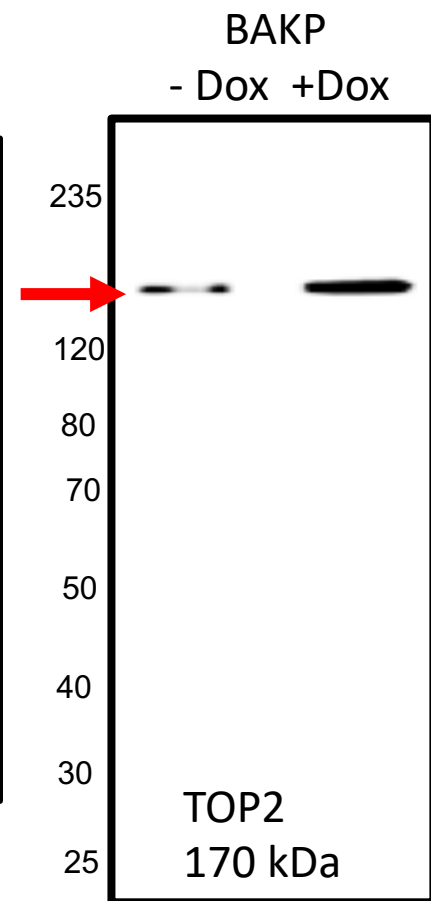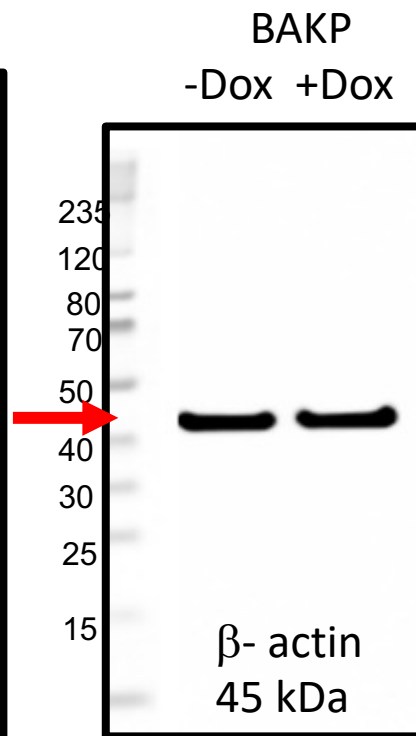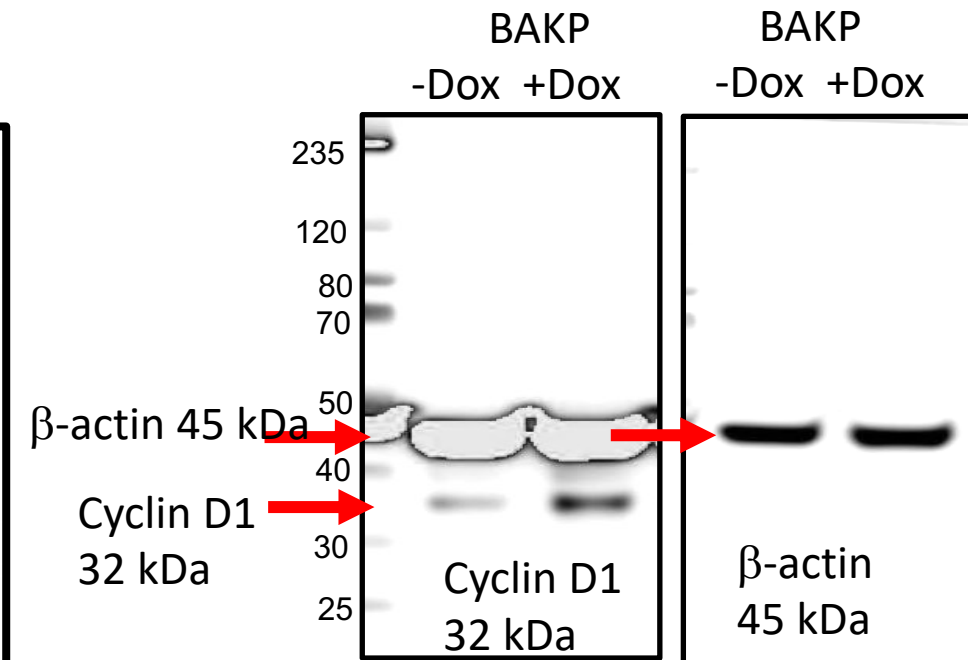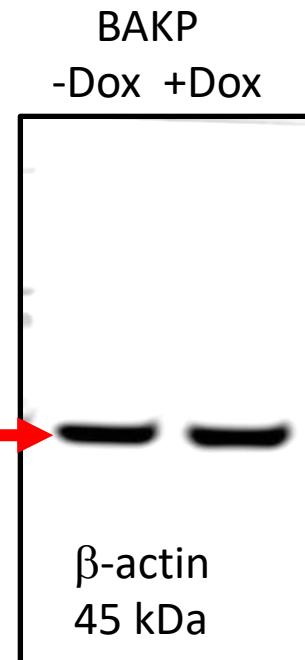

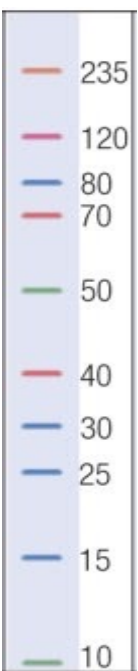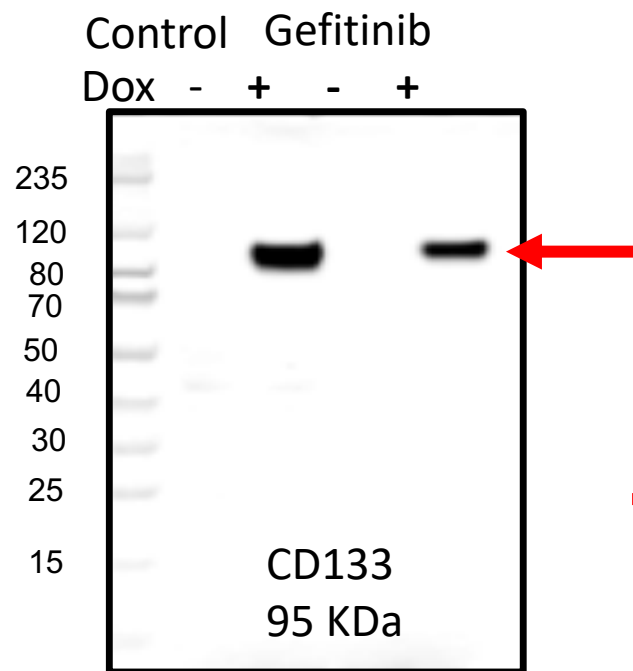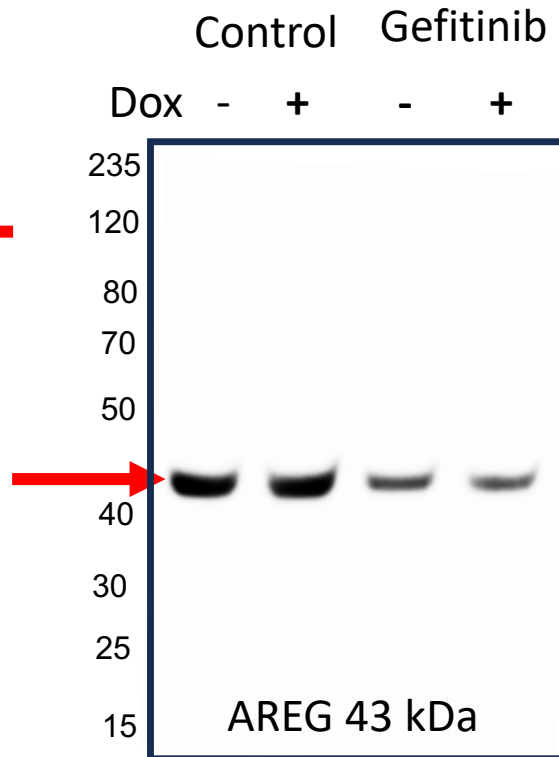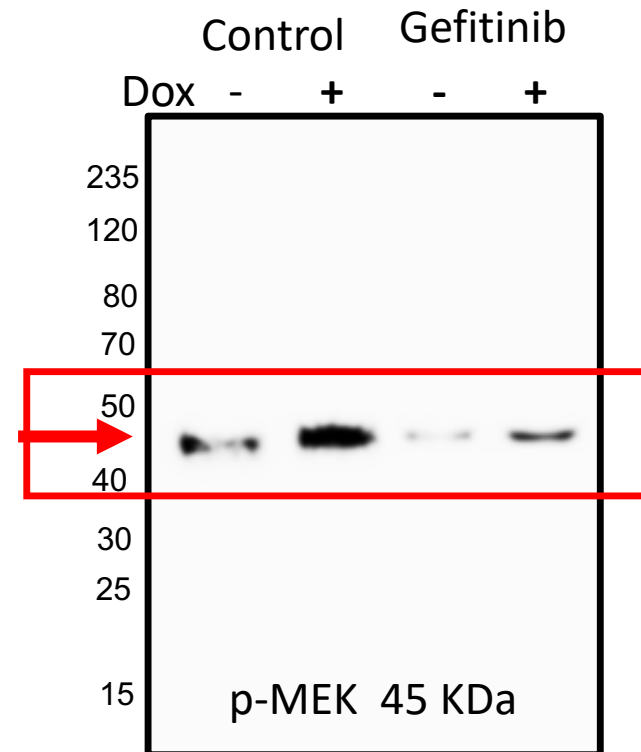

**Figure S2f, The original image of Western Blot in Figure 9B.**

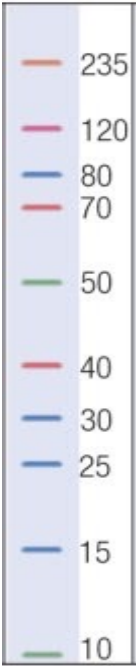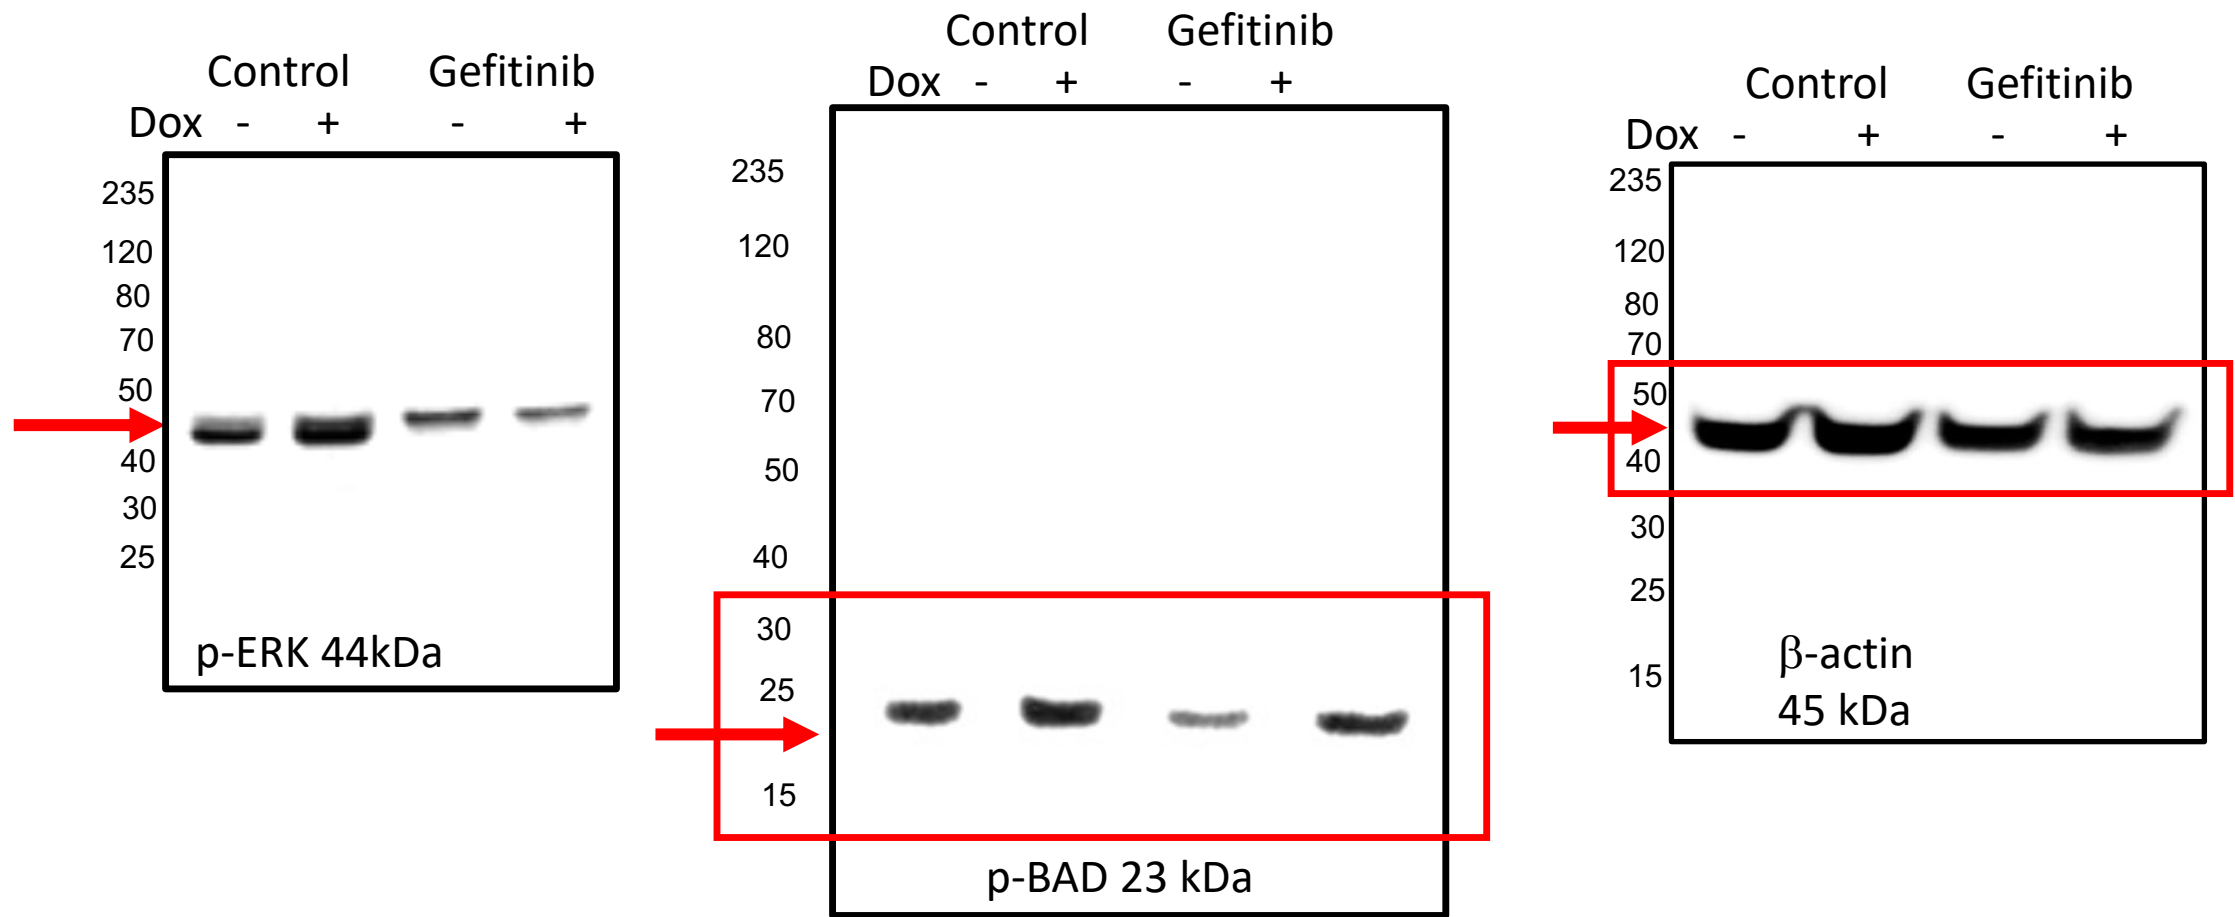

Figure S2f, The original image of Western Blot in Figure 9B.

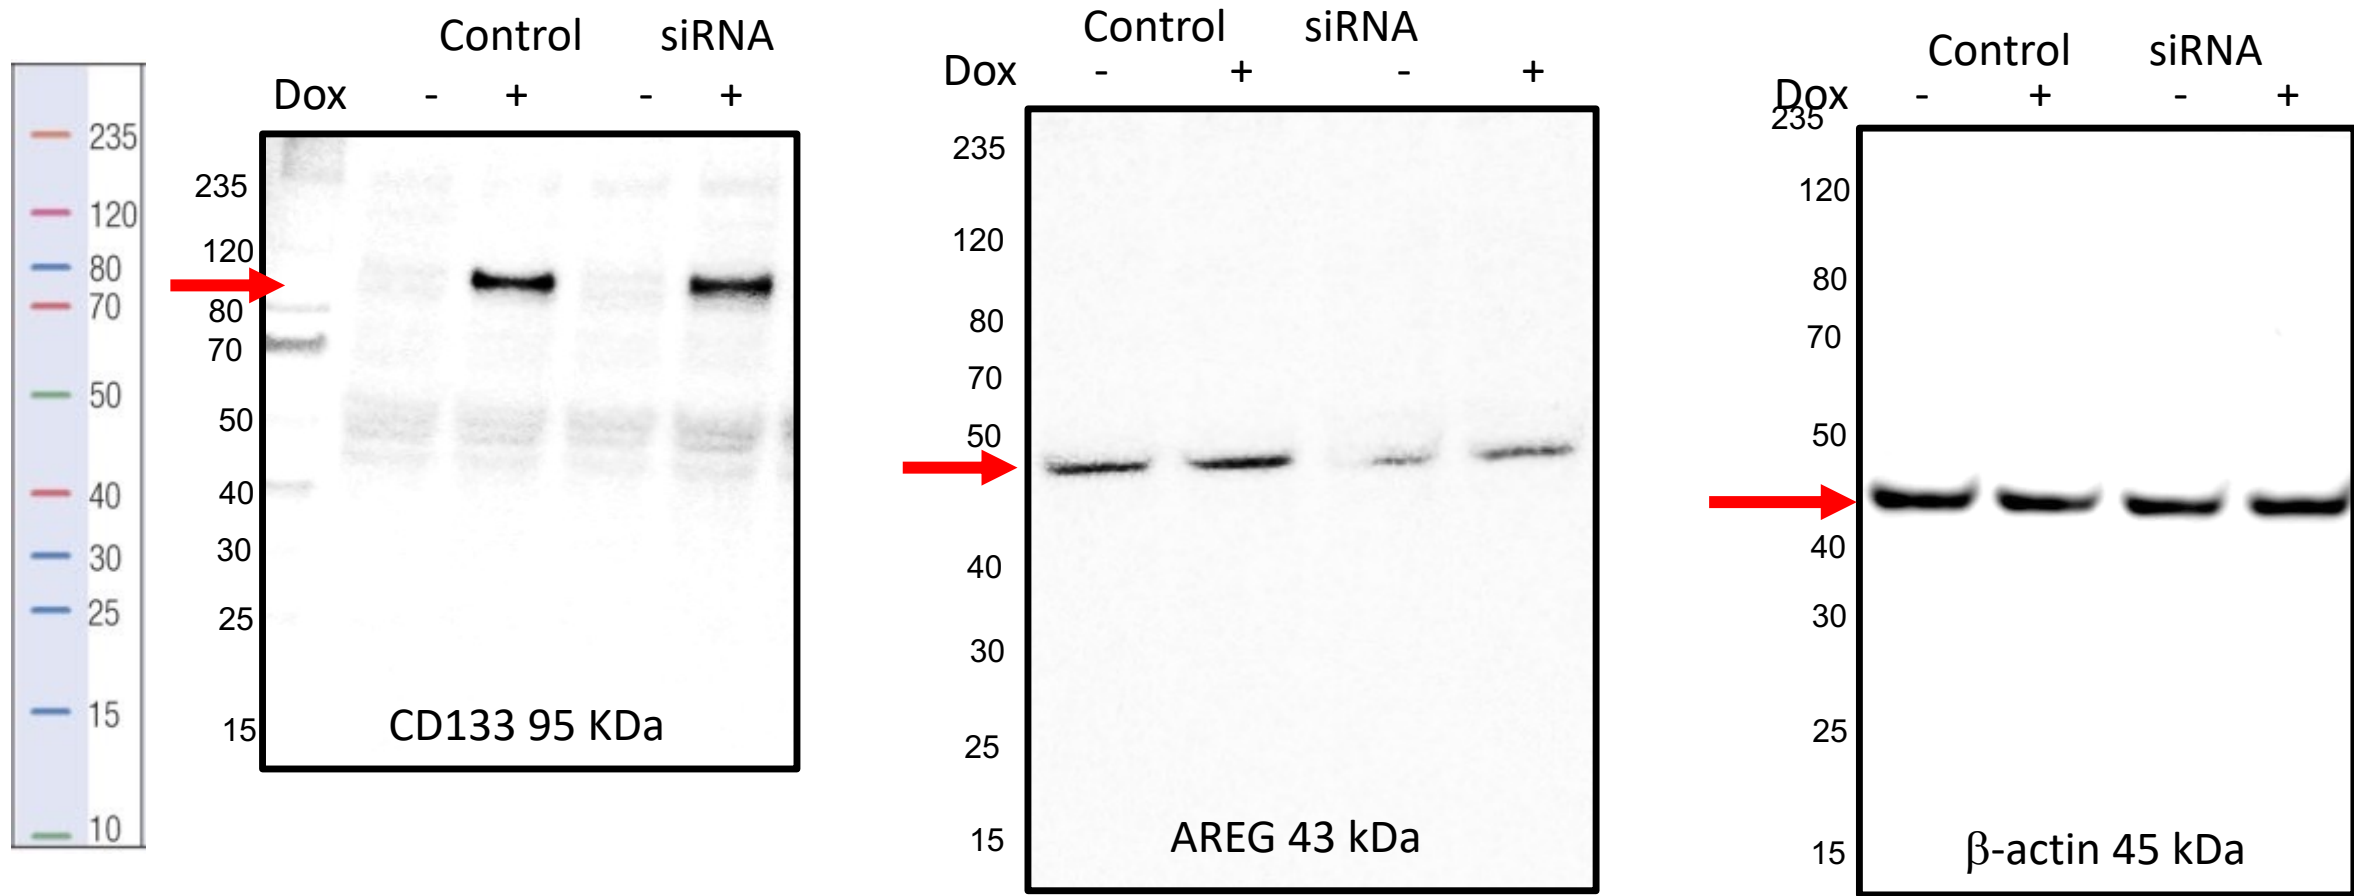

Figure S2g, The original image of Western Blot in Figure 10A.
