# Supplementary material for: CD133 Stimulates Cell Proliferation via the Upregulation of Amphiregulin in Melanoma
Source: MDPI journal article supplement (doi:10.3390/cells13090777), 2024-05-02
Supplement: s1 [file s1]

Simbulan-Rosenthal *etal. Cells* 2024

Supplementary  
Figures Figure S1

Vector Maps and Sequences for *pLenti-CMV-rtTA3 Blast* and *pLV-EGFP/Neo-TRE3G-CD133*.

## Vector Summary

|                              |                                                              |
|------------------------------|--------------------------------------------------------------|
| <b>Vector ID</b>             | VB190111-1105mae                                             |
| <b>Vector Name</b>           | pLV[TetOn]-EGFP/Neo-TRE3G>hPROM1[NM_001145850.1]             |
| <b>Vector Size</b>           | 11208 bp                                                     |
| <b>Viral Genome Size</b>     | 7733 bp                                                      |
| <b>Vector Type</b>           | Mammalian Tet-On Inducible Gene Expression Lentiviral Vector |
| <b>Inserted Promoter</b>     | TRE3G                                                        |
| <b>Inserted ORF</b>          | hPROM1[NM_001145850.1]                                       |
| <b>Inserted Marker</b>       | EGFP/Neo                                                     |
| <b>Plasmid Copy Number</b>   | High                                                         |
| <b>Antibiotic Resistance</b> | Ampicillin                                                   |
| <b>Cloning Host</b>          | Stbl3 (or alternative strain)                                |

### Note:

## Vector Map

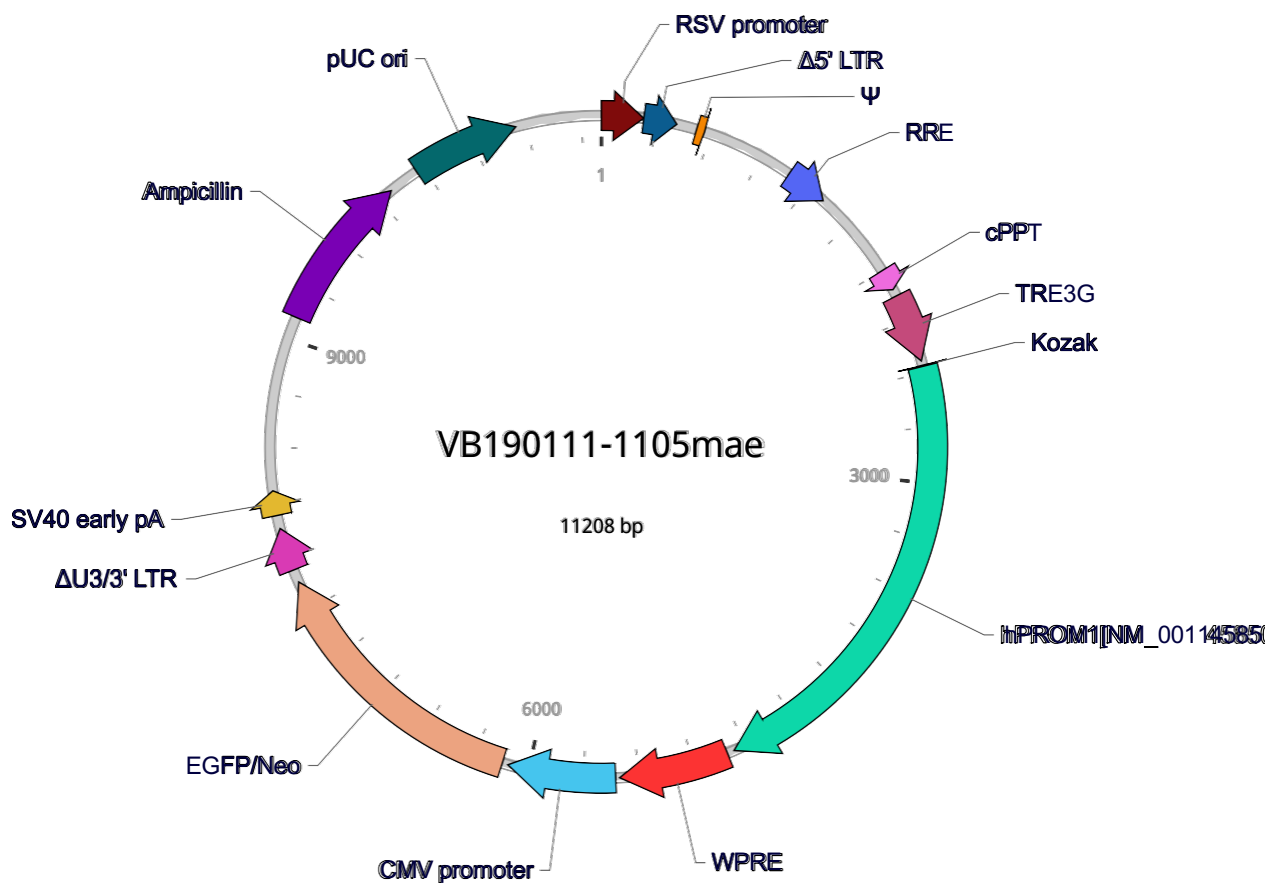

## Vector Components

| Name                          | Position    | Size (bp) | Type          | Description                                                      | Application notes                                                                                                                 |
|-------------------------------|-------------|-----------|---------------|------------------------------------------------------------------|-----------------------------------------------------------------------------------------------------------------------------------|
| RSV promoter                  | ■ 1-229     | 229       | Promoter      | Rous sarcoma virus enhancer/promoter                             | Strong promoter; drives transcription of viral RNA in packaging cells.                                                            |
| Δ5' LTR                       | ■ 230-410   | 181       | LTR           | Truncated HIV-1 5' long terminal repeat                          | Allows transcription of viral RNA and its packaging into virus.                                                                   |
| Ψ                             | ■ 521-565   | 45        | Miscellaneous | Adenovirus packaging signal                                      | Allows packaging of viral DNA into virus.                                                                                         |
| RRE                           | ■ 1075-1308 | 234       | Miscellaneous | HIV-1 Rev response element                                       | Rev protein binding site that allows Rev-dependent nuclear export of viral RNA during viral packaging.                            |
| cPPT                          | ■ 1803-1920 | 118       | Miscellaneous | Central polypurine tract                                         | Facilitates the nuclear import of HIV-1 cDNA through a central DNA flap.                                                          |
| <b>TRE3G</b>                  | ■ 1959-2334 | 376       | Promoter      | Tetracycline-responsive element promoter (3rd generation)        | Bound by transactivator Tet3G in the presence of tetracycline or its analogs (e.g. doxycycline); low background activity.         |
| Kozak                         | ■ 2359-2364 | 6         | Miscellaneous | Kozak translation initiation sequence                            | Facilitates translation initiation of ATG start codon downstream of the Kozak sequence.                                           |
| <b>hPROM1[NM_001145850.1]</b> | ■ 2365-4869 | 2505      | CDS           | <i>None</i>                                                      | <i>None</i>                                                                                                                       |
| WPRE                          | ■ 4908-5505 | 598       | Miscellaneous | Woodchuck hepatitis virus posttranscriptional regulatory element | Enhances virus stability in packaging cells, leading to higher titer of packaged virus; enhances higher expression of transgenes. |
| CMV promoter                  | ■ 5527-6114 | 588       | Promoter      | Human cytomegalovirus immediate early enhancer/promoter          | Strong promoter; may have variable strength in some cell types.                                                                   |

| Name               | Position      | Size (bp) | Type         | Description                                  | Application notes                                                                                                                                                                            |
|--------------------|---------------|-----------|--------------|----------------------------------------------|----------------------------------------------------------------------------------------------------------------------------------------------------------------------------------------------|
| <b>EGFP/Neo</b>    | ■ 6146-7657   | 1512      | CDS          | EGFP fused with Neo                          | Allows cells to be visualized by green fluorescence and resistant to geneticin (G418).                                                                                                       |
| $\Delta$ U3/3' LTR | ■ 7728-7962   | 235       | LTR          | Truncated HIV-1 3' long terminal repeat      | Allows packaging of viral RNA into virus; self-inactivates the 5' LTR by a copying mechanism during viral genome integration; contains polyadenylation signal for transcription termination. |
| SV40 early pA      | ■ 8035-8169   | 135       | PolyA_signal | Simian virus 40 early polyadenylation signal | Allows transcription termination and polyadenylation of mRNA transcribed by Pol II RNA polymerase.                                                                                           |
| Ampicillin         | ■ 9123-9983   | 861       | CDS          | Ampicillin resistance gene                   | Allows E. coli to be resistant to ampicillin.                                                                                                                                                |
| pUC ori            | ■ 10154-10742 | 589       | Rep_origin   | pUC origin of replication                    | Facilitates plasmid replication in E. coli; regulates high-copy plasmid number (500-700).                                                                                                    |

**Note:** Components added by user are listed in **bold red** text.

## Vector Sequence

```

1  AATGTAGTCT TATGCAATAC TCTTGTAGTC TTGCAACATG GTAACGATGA GTTAGCAACA TGCCTTACAA GGAGAGAAAA
81  AGCACCGTGC ATGCCGATTG GTGGAAGTAA GGTGGTACGA TCGTGCCTTA TTAGGAAGGC AACAGACGGG TCTGACATGG
161 ATTGGACGAA CCACTGAATT GCCGCATTGC AGAGATATTG TATTTAAGTG CCTAGCTCGA TACATAAACG GGTCTCTCTG
241 GTTAGACCAG ATCTGAGCCT GGGAGCTCTC TGGCTAACTA GGGAAACCCAC TGCTTAAGCC TCAATAAAGC TTGCCTTGAG
321 TGCTTCAAGT AGTGTGTGCC CGTCTGTTGT GTGACTCTGG TAACTAGAGA TCCCTCAGAC CCTTTTAGTC AGTGTGGAAA
401 ATCTCTAGCA GTGGCGCCCG AACAGGGACT TGAAAGCGAA AGGGAACCA GAGGAGCTCT CTCGACGCAG GACTCGGCTT
481 GCTGAAGCGC GCACGGCAAG AGGCGAGGGG CGGCGACTGG TGAGTACGCC AAAAATTTTG ACTAGCGGAG GCTAGAAGGA
561 GAGAGATGGG TCGGAGAGCG TCAGTATTAA GCGGGGAGA ATTAGATCGC GATGGGAAAA AATTCGGTTA AGGCCAGGGG
641 GAAAGAAAAA ATATAAATTA AAACATATAG TATGGGCAAG CAGGGAGCTA GAACGATTCG CAGTTAATCC TGGCCTGTTA
721 GAAACATCAG AAGGCTGTAG ACAAATACTG GGACAGCTAC AACCATCCCT TCAGACAGGA TCAGAAGAAC TTAGATCATT
801 ATATAATACA GTAGCAACCC TCTATTGTGT GCATCAAAGG ATAGAGATAA AAGACACCAA GGAAGCTTTA GACAAGATAG
881 AGGAAGAGCA AAACAAAAGT AAGACCACCG CACAGCAAGC GGCCGCTGAT CTTAGACCTT GGAGGAGGAG ATATGAGGGA
961 CAATTGGAGA AGTGAATTAT ATAAATATAA AGTAGTAAAA ATTGAACCAT TAGGAGTAGC ACCCACCAAG GCAAAGAGAA

```

|      |                            |                            |                             |                             |                            |                             |                            |                             |
|------|----------------------------|----------------------------|-----------------------------|-----------------------------|----------------------------|-----------------------------|----------------------------|-----------------------------|
| 1041 | <a href="#">GAGTGGTGCA</a> | <a href="#">GAGAGAAAAA</a> | <a href="#">AGAGCAGTGG</a>  | <a href="#">GAATAGGAGC</a>  | <a href="#">TTGTTCCTT</a>  | <a href="#">GGGTTCTTGG</a>  | <a href="#">GAGCAGCAGG</a> | <a href="#">AAGCACTATG</a>  |
| 1121 | <a href="#">GGCGCAGCGT</a> | <a href="#">CAATGACGCT</a> | <a href="#">GACGGTACAG</a>  | <a href="#">GCCAGACAAT</a>  | <a href="#">TATGTCTG</a>   | <a href="#">TATAGTGCAG</a>  | <a href="#">CAGCAGAACA</a> | <a href="#">ATTGCTGAG</a>   |
| 1201 | <a href="#">GGCTATTGAG</a> | <a href="#">GCGCAACAGC</a> | <a href="#">ATCTGTTGCA</a>  | <a href="#">ACTCACAGTC</a>  | <a href="#">TGGGTCATCA</a> | <a href="#">AGCAGCTCCA</a>  | <a href="#">GGCAAGAATC</a> | <a href="#">CTGGCTGTGG</a>  |
| 1281 | <a href="#">AAAGATACCT</a> | <a href="#">AAAGGATCAA</a> | <a href="#">CAGCTCCTGG</a>  | <a href="#">GGATTGGGG</a>   | <a href="#">TTGCTCTGGA</a> | <a href="#">AAACTCATTT</a>  | <a href="#">GCACCACTGC</a> | <a href="#">TGTGCCTTGG</a>  |
| 1361 | <a href="#">AATGCTAGTT</a> | <a href="#">GGAGTAATAA</a> | <a href="#">ATCTCTGGAA</a>  | <a href="#">CAGATTGGA</a>   | <a href="#">ATCACACGAC</a> | <a href="#">CTGGATGGAG</a>  | <a href="#">TGGGACAGAG</a> | <a href="#">AAATTAACAA</a>  |
| 1441 | <a href="#">TTACACAAGC</a> | <a href="#">TTAATACACT</a> | <a href="#">CCTTAATTGA</a>  | <a href="#">AGAATCGCAA</a>  | <a href="#">AACCAGCAAG</a> | <a href="#">AAAAGAATGA</a>  | <a href="#">ACAAGAATTA</a> | <a href="#">TTGGAATTAG</a>  |
| 1521 | <a href="#">ATAAATGGGC</a> | <a href="#">AAGTTTGTGG</a> | <a href="#">AATTGGTTTA</a>  | <a href="#">ACATAACAAA</a>  | <a href="#">TTGGCTGTGG</a> | <a href="#">TATATAAAAT</a>  | <a href="#">TATTCATAAT</a> | <a href="#">GATAGTAGGA</a>  |
| 1601 | <a href="#">GGCTTGGTAG</a> | <a href="#">GTTTAAGAAT</a> | <a href="#">AGTTTTTGCT</a>  | <a href="#">GTACTTTCTA</a>  | <a href="#">TAGTGAATAG</a> | <a href="#">AGTTAGGCAG</a>  | <a href="#">GGATATTCAC</a> | <a href="#">CATTATCGTT</a>  |
| 1681 | <a href="#">TCAGACCCAC</a> | <a href="#">CTCCCAACCC</a> | <a href="#">CGAGGGGACC</a>  | <a href="#">CGACAGGCC</a>   | <a href="#">GAAGGAATAG</a> | <a href="#">AAGAAGAAGG</a>  | <a href="#">TGGAGAGAGA</a> | <a href="#">GACAGAGACA</a>  |
| 1761 | <a href="#">GATCCATTCG</a> | <a href="#">ATTAGTGAAC</a> | <a href="#">GGATCTCGAC</a>  | <a href="#">GGTATCGCTA</a>  | <a href="#">GCTTTTAAAA</a> | <a href="#">GAAAAGGGGG</a>  | <a href="#">GATTGGGGGG</a> | <a href="#">TACAGTGCAG</a>  |
| 1841 | <a href="#">GGGAAAGAA</a>  | <a href="#">AGTAGACATA</a> | <a href="#">ATAGCAACAG</a>  | <a href="#">ACATACAAAC</a>  | <a href="#">TAAAGAATTA</a> | <a href="#">CAAAAACAAA</a>  | <a href="#">TTACAAAAAT</a> | <a href="#">TCAAAATTTT</a>  |
| 1921 | <a href="#">ACTAGTGATT</a> | <a href="#">ATCGGATCAA</a> | <a href="#">CTTTGTATAG</a>  | <a href="#">AAAAGTTGTT</a>  | <a href="#">TACTCCCTAT</a> | <a href="#">CAGTGATAGA</a>  | <a href="#">GAACGTATGA</a> | <a href="#">AGAGTTTACT</a>  |
| 2001 | <a href="#">CCCTATCAGT</a> | <a href="#">GATAGAGAAC</a> | <a href="#">GTATGCAGAC</a>  | <a href="#">TTTACTCCCT</a>  | <a href="#">ATCAGTGATA</a> | <a href="#">GAGAACGTAT</a>  | <a href="#">AAGGAGTTTA</a> | <a href="#">CTCCCTATCA</a>  |
| 2081 | <a href="#">GTGATAGAGA</a> | <a href="#">ACGTATGACC</a> | <a href="#">AGTTTACTCC</a>  | <a href="#">CTATCAGTGA</a>  | <a href="#">TAGAGAACGT</a> | <a href="#">ATCTACAGTT</a>  | <a href="#">TACTCCCTAT</a> | <a href="#">CAGTGATAGA</a>  |
| 2161 | <a href="#">GAACGTATAT</a> | <a href="#">CCAGTTTACT</a> | <a href="#">CCCTATCAGT</a>  | <a href="#">GATAGAGAAC</a>  | <a href="#">GTATAAGCTT</a> | <a href="#">TAGGCGTGTA</a>  | <a href="#">CGGTGGGCGC</a> | <a href="#">CTATAAAAGC</a>  |
| 2241 | <a href="#">AGAGCTCGTT</a> | <a href="#">TAGTGAACCG</a> | <a href="#">TCAGATCGCC</a>  | <a href="#">TGGAGCAATT</a>  | <a href="#">CCACAACACT</a> | <a href="#">TTTGTCTTAT</a>  | <a href="#">ACCAACTTTC</a> | <a href="#">CGTACCACCT</a>  |
| 2321 | <a href="#">CCTACCTCG</a>  | <a href="#">TAAACAAGTT</a> | <a href="#">TGTACAAAAA</a>  | <a href="#">AGCAGGCTGC</a>  | <a href="#">CACCATGGCC</a> | <a href="#">CTCGTACTCG</a>  | <a href="#">GCTCCCTGTT</a> | <a href="#">GCTGCTGGGG</a>  |
| 2401 | <a href="#">CTGTGCGGGA</a> | <a href="#">ACTCCTTTTC</a> | <a href="#">AGGAGGGCAG</a>  | <a href="#">CCTTCATCCA</a>  | <a href="#">CAGATGCTCC</a> | <a href="#">TAAGGCTTGG</a>  | <a href="#">AATTATGAAT</a> | <a href="#">TGCCTGCAAC</a>  |
| 2481 | <a href="#">AAATTATGAG</a> | <a href="#">ACCCAAGACT</a> | <a href="#">CCCATAAAGC</a>  | <a href="#">TGGACCCATT</a>  | <a href="#">GGCATTCTCT</a> | <a href="#">TTGAACTAGT</a>  | <a href="#">GCATATCTTT</a> | <a href="#">CTCTATGTGG</a>  |
| 2561 | <a href="#">TACAGCCGCG</a> | <a href="#">TGATTTCCCA</a> | <a href="#">GAAGATACTT</a>  | <a href="#">TGAGAAAATT</a>  | <a href="#">CTTACAGAAG</a> | <a href="#">GCATATGAAT</a>  | <a href="#">CCAAAATTGA</a> | <a href="#">TTATGACAAG</a>  |
| 2641 | <a href="#">CCAGAAACTG</a> | <a href="#">TAATCTTAGG</a> | <a href="#">TCTAAAGATT</a>  | <a href="#">GTCTACTATG</a>  | <a href="#">AAGCAGGGAT</a> | <a href="#">TATTCTATGC</a>  | <a href="#">TGTGTCCTGG</a> | <a href="#">GGCTGCTGTT</a>  |
| 2721 | <a href="#">TATTATCTTG</a> | <a href="#">ATGCCCTG</a>   | <a href="#">TGGGGTATTT</a>  | <a href="#">CTTTTGTATG</a>  | <a href="#">TGTCGTTGCT</a> | <a href="#">GTAACAAATG</a>  | <a href="#">TGGTGAGAA</a>  | <a href="#">ATGCACCAGC</a>  |
| 2801 | <a href="#">GACAGAAGGA</a> | <a href="#">AAATGGGCCC</a> | <a href="#">TTCCTGAGGA</a>  | <a href="#">AATGCTTTCG</a>  | <a href="#">AATCTCCCTG</a> | <a href="#">TTGGTGATTT</a>  | <a href="#">GTATAATAAT</a> | <a href="#">AAGCATTGGC</a>  |
| 2881 | <a href="#">ATCTTCTATG</a> | <a href="#">GTTTTGTGGC</a> | <a href="#">AAATCACCAG</a>  | <a href="#">GTAAGAACCC</a>  | <a href="#">GGATCAAAAG</a> | <a href="#">GAGTCGGAAA</a>  | <a href="#">CTGGCAGATA</a> | <a href="#">GCAATTTCAA</a>  |
| 2961 | <a href="#">GGACTTGCGA</a> | <a href="#">ACTCTCTTGA</a> | <a href="#">ATGAAACTCC</a>  | <a href="#">AGAGCAAAATC</a> | <a href="#">AAATATATAT</a> | <a href="#">TGGCCCAGTA</a>  | <a href="#">CAACACTACC</a> | <a href="#">AAGGACAAGG</a>  |
| 3041 | <a href="#">CGTTCACAGA</a> | <a href="#">TCTGAACAGT</a> | <a href="#">ATCAATTCAG</a>  | <a href="#">TGCTAGGAGG</a>  | <a href="#">CGGAATTCTT</a> | <a href="#">GACCGACTGA</a>  | <a href="#">GACCCAACAT</a> | <a href="#">CATCCCTGTT</a>  |
| 3121 | <a href="#">CTTGATGAGA</a> | <a href="#">TTAAGTCCAT</a> | <a href="#">GGCAACAGCG</a>  | <a href="#">ATCAAGGAGA</a>  | <a href="#">CCAAAGAGGC</a> | <a href="#">GTTGGAGAAC</a>  | <a href="#">ATGAACAGCA</a> | <a href="#">CCTTGAAGAG</a>  |
| 3201 | <a href="#">CTTGACCAAA</a> | <a href="#">CAAAGTACAC</a> | <a href="#">AGCTTAGCAG</a>  | <a href="#">CAGCTGACC</a>   | <a href="#">AGCGTGAAAA</a> | <a href="#">CTAGCCTGCG</a>  | <a href="#">GTCATCTCTC</a> | <a href="#">AATGACCCTC</a>  |
| 3281 | <a href="#">TGTGCTTGGT</a> | <a href="#">GCATCCATCA</a> | <a href="#">AGTGAAACCT</a>  | <a href="#">GCAACAGCAT</a>  | <a href="#">CAGATTGTCT</a> | <a href="#">CTAAGCCAGC</a>  | <a href="#">TGAATAGCAA</a> | <a href="#">CCCTGAACTG</a>  |
| 3361 | <a href="#">AGGCAGCTTC</a> | <a href="#">CACCCGTGGA</a> | <a href="#">TGCAGAACTT</a>  | <a href="#">GACAACGTTA</a>  | <a href="#">ATAACGTTCT</a> | <a href="#">TAGGACAGAT</a>  | <a href="#">TTGGATGGCC</a> | <a href="#">TGGTCCAACA</a>  |
| 3441 | <a href="#">GGGCTATCAA</a> | <a href="#">TCCCTTAATG</a> | <a href="#">ATATACCTGA</a>  | <a href="#">CAGAGTACAA</a>  | <a href="#">CGCCAAACCA</a> | <a href="#">CGACTGTCGT</a>  | <a href="#">AGCAGGTATC</a> | <a href="#">AAAAGGGTCT</a>  |
| 3521 | <a href="#">TGAATTCCAT</a> | <a href="#">TGGTTCAGAT</a> | <a href="#">ATCGACAATG</a>  | <a href="#">TAACTCAGCG</a>  | <a href="#">TCTTCTTATT</a> | <a href="#">CAGGATATAC</a>  | <a href="#">TCTCAGCATT</a> | <a href="#">CTCTGTTTAT</a>  |
| 3601 | <a href="#">GTTAATAACA</a> | <a href="#">CTGAAAGTTA</a> | <a href="#">CATCCACAGA</a>  | <a href="#">AATTTACCTA</a>  | <a href="#">CATTGGAAGA</a> | <a href="#">GTATGATTCA</a>  | <a href="#">TACTGGTGGC</a> | <a href="#">TGGGTGGCCT</a>  |
| 3681 | <a href="#">GGTCATCTGC</a> | <a href="#">TCTCTGCTGA</a> | <a href="#">CCCTCATCGT</a>  | <a href="#">GATTTTTTAC</a>  | <a href="#">TACCTGGGCT</a> | <a href="#">TACTGTGTGG</a>  | <a href="#">CGTGTGCGGC</a> | <a href="#">TATGACAGGC</a>  |
| 3761 | <a href="#">ATGCCACCCC</a> | <a href="#">GACCACCCGA</a> | <a href="#">GGCTGTGTCT</a>  | <a href="#">CCAACACCGG</a>  | <a href="#">AGGCGTCTTC</a> | <a href="#">CTCATGGTTG</a>  | <a href="#">GAGTTGGATT</a> | <a href="#">AAGTTTCCTC</a>  |
| 3841 | <a href="#">TTTTGCTGGA</a> | <a href="#">TATTGATGAT</a> | <a href="#">CATTGTGGTT</a>  | <a href="#">CTTACCTTTG</a>  | <a href="#">TCTTTGGTGC</a> | <a href="#">AAATGTGGAA</a>  | <a href="#">AAACTGATCT</a> | <a href="#">GTGAACCTTA</a>  |
| 3921 | <a href="#">CACGAGCAAG</a> | <a href="#">GAATTATTCC</a> | <a href="#">GGGTTTTTGA</a>  | <a href="#">TACACCCTAC</a>  | <a href="#">TTACTAAATG</a> | <a href="#">AAGACTGGGA</a>  | <a href="#">ATACTATCTC</a> | <a href="#">TCTGGGAAGC</a>  |
| 4001 | <a href="#">TATTTAATAA</a> | <a href="#">ATCAAAAATG</a> | <a href="#">AAGCTCACTT</a>  | <a href="#">TTGAACAAGT</a>  | <a href="#">TTACAGTGAC</a> | <a href="#">TGCAAAAAAA</a>  | <a href="#">ATAGAGGCAC</a> | <a href="#">TTACGGCACT</a>  |
| 4081 | <a href="#">CTTACCTGTC</a> | <a href="#">AGAACAGCTT</a> | <a href="#">CAATATCAGT</a>  | <a href="#">GAACATCTCA</a>  | <a href="#">ACATTAATGA</a> | <a href="#">GCATACTGGA</a>  | <a href="#">AGCATAAGCA</a> | <a href="#">GTGAATTGGA</a>  |
| 4161 | <a href="#">AAGTCTGAAG</a> | <a href="#">GTAAATCTTA</a> | <a href="#">ATATCTTTCT</a>  | <a href="#">GTTGGGTGCA</a>  | <a href="#">GCAGGAAGAA</a> | <a href="#">AAAACCTTCA</a>  | <a href="#">GGATTTTGCT</a> | <a href="#">GCTTGTGGAA</a>  |
| 4241 | <a href="#">TAGACAGAA</a>  | <a href="#">GAATTATGAC</a> | <a href="#">AGCTACTTGG</a>  | <a href="#">CTCAGACTGG</a>  | <a href="#">TAAATCCCCC</a> | <a href="#">GCAGGAGTGA</a>  | <a href="#">ATCTTTTATC</a> | <a href="#">ATTTGCATAT</a>  |
| 4321 | <a href="#">GATCTAGAAG</a> | <a href="#">CAAAAGCAAA</a> | <a href="#">CAGTTTGCCC</a>  | <a href="#">CCAGGAAATT</a>  | <a href="#">TGAGGAACTC</a> | <a href="#">CCTGAAAAGA</a>  | <a href="#">GATGCACAAA</a> | <a href="#">CTATTAATAAC</a> |
| 4401 | <a href="#">AATTCACCAG</a> | <a href="#">CAACGAGTCC</a> | <a href="#">TTCCTATAGA</a>  | <a href="#">ACAATCACTG</a>  | <a href="#">AGCACTCTAT</a> | <a href="#">ACCAAAGCGT</a>  | <a href="#">CAAGATACTT</a> | <a href="#">CAACGCACAG</a>  |
| 4481 | <a href="#">GGAATGGATT</a> | <a href="#">GTTGGAGAGA</a> | <a href="#">GTAAC TAGGA</a> | <a href="#">TTCTAGCTTC</a>  | <a href="#">TCTGGATTTT</a> | <a href="#">GCTCAGAACT</a>  | <a href="#">TCATCACAAA</a> | <a href="#">CAATACTTCC</a>  |
| 4561 | <a href="#">TCTGTTATTA</a> | <a href="#">TTGAGGAAAC</a> | <a href="#">TAAGAAGTAT</a>  | <a href="#">GGGAGAACAA</a>  | <a href="#">TAATAGGATA</a> | <a href="#">TTTTGAACAT</a>  | <a href="#">TATCTGCAGT</a> | <a href="#">GGATCGAGTT</a>  |
| 4641 | <a href="#">CTCTATCAGT</a> | <a href="#">GAGAAAGTGG</a> | <a href="#">CATCGTGCAA</a>  | <a href="#">ACCTGTGGCC</a>  | <a href="#">ACCGCTCTAG</a> | <a href="#">ATACTGCTGT</a>  | <a href="#">TGATGTCTTT</a> | <a href="#">CTGTGTAGCT</a>  |
| 4721 | <a href="#">ACATTATCGA</a> | <a href="#">CCCCTTGAAT</a> | <a href="#">TTGTTTTGGT</a>  | <a href="#">TTGGCATAGG</a>  | <a href="#">AAAAGCTACT</a> | <a href="#">GTATTTTTTAC</a> | <a href="#">TTCCGGCTCT</a> | <a href="#">AATTTTTTGC</a>  |
| 4801 | <a href="#">GTAAAACTGG</a> | <a href="#">CTAAGTACTA</a> | <a href="#">TCGTGCAATG</a>  | <a href="#">GATTTCGAGG</a>  | <a href="#">ACGTGTACGA</a> | <a href="#">TGACCCATCA</a>  | <a href="#">CAACATTGAA</a> | <a href="#">CCCAGCTTTC</a>  |

|      |                   |                    |                   |                   |                   |                   |                    |                    |
|------|-------------------|--------------------|-------------------|-------------------|-------------------|-------------------|--------------------|--------------------|
| 4881 | <u>TTGTACAAAG</u> | <u>TGGTGATAAT</u>  | <u>CGAATTCCGA</u> | <u>TAATCAACCT</u> | <u>CTGGATTACA</u> | <u>AAATTTGTGA</u> | <u>AAGATTGACT</u>  | <u>GGTATTCTTA</u>  |
| 4961 | <u>ACTATGTTGC</u> | <u>TCCTTTTACG</u>  | <u>CTATGTGGAT</u> | <u>ACGCTGCTTT</u> | <u>AATGCCTTTG</u> | <u>TATCATGCTA</u> | <u>TTGCTTCCCG</u>  | <u>TATGGCTTTC</u>  |
| 5041 | <u>ATTTTCTCCT</u> | <u>CCTTGTATAA</u>  | <u>ATCCTGGTTG</u> | <u>CTGTCTCTTT</u> | <u>ATGAGGAGTT</u> | <u>GTGGCCCGTT</u> | <u>GTCAGGCAAC</u>  | <u>GTGGCGTGGT</u>  |
| 5121 | <u>GTGCACTGTG</u> | <u>TTTGCTGACG</u>  | <u>CAACCCCCAC</u> | <u>TGGTTGGGGC</u> | <u>ATTGCCACCA</u> | <u>CCTGTCAGCT</u> | <u>CCTTTCGGG</u>   | <u>ACTTTCGCTT</u>  |
| 5201 | <u>TCCCCCTCCC</u> | <u>TATTGCCACG</u>  | <u>GCGGAACCTA</u> | <u>TCGCCCGCTG</u> | <u>CCTTGCCCGC</u> | <u>TGCTGGACAG</u> | <u>GGGCTCGGCT</u>  | <u>GTGGGGCACT</u>  |
| 5281 | <u>GACAATTCCG</u> | <u>TGGTGTGTGC</u>  | <u>GGGGAAGCTG</u> | <u>ACGTCTTTTC</u> | <u>CATGGCTGCT</u> | <u>CGCTGTGTT</u>  | <u>GCCACCTGGA</u>  | <u>TTCTGCGCGG</u>  |
| 5361 | <u>GACGTCCTTC</u> | <u>TGCTACGTCC</u>  | <u>CTTCGGCCCT</u> | <u>CAATCCAGCG</u> | <u>GACCTTCCTT</u> | <u>CCCGCGGCTT</u> | <u>GCTGCGGCTT</u>  | <u>CTGCGGCCTC</u>  |
| 5441 | <u>TTCCGCGTCT</u> | <u>TCGCCTTCGC</u>  | <u>CCTCAGACGA</u> | <u>GTCGGATCTC</u> | <u>CCTTTGGGCC</u> | <u>GCCTCCCCGC</u> | <u>ATCGGGAATT</u>  | <u>CCC GCGGTTT</u> |
| 5521 | <u>GAACGCGTTG</u> | <u>ACATTGATTA</u>  | <u>TTGACTAGTT</u> | <u>ATTAATAGTA</u> | <u>ATCAATTACG</u> | <u>GGGTCATTAG</u> | <u>TTCATAGCCC</u>  | <u>ATATATGGAG</u>  |
| 5601 | <u>TTCCGCGTTA</u> | <u>CATAACTTAC</u>  | <u>GGTAAATGGC</u> | <u>CCGCTTGGCT</u> | <u>GACCGCCCAA</u> | <u>CGACCCCGCG</u> | <u>CCATTGACGT</u>  | <u>CAATAATGAC</u>  |
| 5681 | <u>GTATGTTCCC</u> | <u>ATAGTAACGC</u>  | <u>CAATAGGGAC</u> | <u>TTTCCATTGA</u> | <u>CGTCAATGGG</u> | <u>TGGAGTATTT</u> | <u>ACGGTAAACT</u>  | <u>GCCCACTTGG</u>  |
| 5761 | <u>CAGTACATCA</u> | <u>AGTGTATCAT</u>  | <u>ATGCCAAGTA</u> | <u>CGCCCCCTAT</u> | <u>TGACGTCAAT</u> | <u>GACGGTAAAT</u> | <u>GGCCCGCCTG</u>  | <u>GCATTATGCC</u>  |
| 5841 | <u>CAGTACATGA</u> | <u>CCTTATGGGA</u>  | <u>CTTTCCTACT</u> | <u>TGGCAGTACA</u> | <u>TCTACGTATT</u> | <u>AGTCATCGCT</u> | <u>ATTACCATGG</u>  | <u>TGATGCGGTT</u>  |
| 5921 | <u>TTGGCAGTAC</u> | <u>ATCAATGGGC</u>  | <u>GTGGATAGCG</u> | <u>GTTTGACTCA</u> | <u>CGGGGATTTC</u> | <u>CAAGTCTCCA</u> | <u>CCCCATTGAC</u>  | <u>GTCAATGGGA</u>  |
| 6001 | <u>GTTTGTTTTG</u> | <u>GCACCAAAAT</u>  | <u>CAACGGGACT</u> | <u>TTCCAAAATG</u> | <u>TCGTAACAAC</u> | <u>TCCGCCCCAT</u> | <u>TGACGCAAAAT</u> | <u>GGGCGGTAGG</u>  |
| 6081 | <u>CGTGTACGGT</u> | <u>GGGAGGTCTA</u>  | <u>TATAAGCAGA</u> | <u>GCTCTCTGGC</u> | <u>TAAGTAGAGA</u> | <u>ACCCACTGCG</u> | <u>CCACCATGGT</u>  | <u>GAGCAAGGGC</u>  |
| 6161 | <u>GAGGAGCTGT</u> | <u>TCACCGGGGT</u>  | <u>GGTGCCCATC</u> | <u>CTGGTCGAGC</u> | <u>TGGACGGCGA</u> | <u>CGTAAACGGC</u> | <u>CACAAGTTCA</u>  | <u>CGGTGTCCGG</u>  |
| 6241 | <u>CGAGGGCGAG</u> | <u>GGCGATGCCA</u>  | <u>CCTACGGCAA</u> | <u>GCTGACCCTG</u> | <u>AAGTTCATCT</u> | <u>GCACCACCGG</u> | <u>CAAGCTGCCC</u>  | <u>GTGCCCTGGC</u>  |
| 6321 | <u>CCACCCTCGT</u> | <u>GACCACCCTG</u>  | <u>ACCTACGGCG</u> | <u>TGCAGTGCTT</u> | <u>CAGCCGCTAC</u> | <u>CCCGACCACA</u> | <u>TGAAGCAGCA</u>  | <u>CGACTTCTTC</u>  |
| 6401 | <u>AAGTCCGCCA</u> | <u>TGCCCCAAGG</u>  | <u>CTACGTCCAG</u> | <u>GAGCGCACCA</u> | <u>TCTTCTTCAA</u> | <u>GGACGACGGC</u> | <u>AACTACAAGA</u>  | <u>CCC GCGCCGA</u> |
| 6481 | <u>GGTGAAGTTC</u> | <u>GAGGGCGACA</u>  | <u>CCCTGGTGAA</u> | <u>CCGCATCGAG</u> | <u>CTGAAGGGCA</u> | <u>TCGACTTCAA</u> | <u>GGAGGACGGC</u>  | <u>AACATCTTGG</u>  |
| 6561 | <u>GGCACAAGCT</u> | <u>GGAGTACAAC</u>  | <u>TACAACAGCC</u> | <u>ACAACGTCTA</u> | <u>TATCATGGCC</u> | <u>GACAAGCAGA</u> | <u>AGAACGGCAT</u>  | <u>CAAGGTGAAC</u>  |
| 6641 | <u>TTCAAGATCC</u> | <u>GCCACAACAT</u>  | <u>CGAGGACGGC</u> | <u>AGCGTGCAGC</u> | <u>TCGCCGACCA</u> | <u>CTACCAGCAG</u> | <u>AACACCCCCA</u>  | <u>TCGGCGACGG</u>  |
| 6721 | <u>CCCCGTGCTG</u> | <u>CTGCCCGACA</u>  | <u>ACCACTACCT</u> | <u>GAGCACCCAG</u> | <u>TCCGCCCTGA</u> | <u>GCAAAGACCC</u> | <u>CAACGAGAAG</u>  | <u>CGCGATCACA</u>  |
| 6801 | <u>TGGTCTTGCT</u> | <u>GGAGTTTCGT</u>  | <u>ACCGCCGCGG</u> | <u>GGATCACTCT</u> | <u>CGGCATGGAC</u> | <u>GAGCTGTACA</u> | <u>AGATGATTGA</u>  | <u>ACAAGATGGA</u>  |
| 6881 | <u>TTGCACGCAG</u> | <u>GTCTCTCCGG</u>  | <u>CGCTTGGGTG</u> | <u>GAGAGGCTAT</u> | <u>TCGGCTATGA</u> | <u>CTGGGCACAA</u> | <u>CAGACAATCG</u>  | <u>GCTGCTCTGA</u>  |
| 6961 | <u>TGCCGCCGTG</u> | <u>TTCCGGCTGT</u>  | <u>CAGCGCAGGG</u> | <u>GCGCCCGGTT</u> | <u>CTTTTGTGTA</u> | <u>AGACCGACCT</u> | <u>GTCCGGTGCC</u>  | <u>CTGAATGAAC</u>  |
| 7041 | <u>TGCAAGACGA</u> | <u>GGCAGCGCGG</u>  | <u>CTATCGTGGC</u> | <u>TGGCCACGAC</u> | <u>GGGCGTTTCT</u> | <u>TGCGCAGCTG</u> | <u>TGCTCGACGT</u>  | <u>TGTCACTGAA</u>  |
| 7121 | <u>GCGGGAAGGG</u> | <u>ACTGGCTGCT</u>  | <u>ATTGGGCGAA</u> | <u>GTGCCGGGGC</u> | <u>AGGATCTCCT</u> | <u>GTCATCTCAC</u> | <u>CTTGCTCCTG</u>  | <u>CCGAGAAAGT</u>  |
| 7201 | <u>ATCCATCATG</u> | <u>GCTGATGCAA</u>  | <u>TGCGGCGGCT</u> | <u>GCATACGCTT</u> | <u>GATCCGGCTA</u> | <u>CCTGCCCAT</u>  | <u>CGACCACCAA</u>  | <u>GCGAAACATC</u>  |
| 7281 | <u>GCATCGAGCG</u> | <u>AGCACGTACT</u>  | <u>CGGATGGAAG</u> | <u>CCGCTCTTGT</u> | <u>CGATCAGGAT</u> | <u>GATCTGGACG</u> | <u>AAGAGCATCA</u>  | <u>GGGGCTCGCG</u>  |
| 7361 | <u>CCAGCCGAAC</u> | <u>TGTTCCGCCG</u>  | <u>GCTCAAGGCG</u> | <u>AGCATGCCCG</u> | <u>ACGGCGAGGA</u> | <u>TCTCGTCGTG</u> | <u>ACCCATGGCG</u>  | <u>ATGCCTGCCT</u>  |
| 7441 | <u>GCCGAATATC</u> | <u>ATGGTGGAAG</u>  | <u>ATGGCCGCTT</u> | <u>TTCTGGATTG</u> | <u>ATCGACTGTG</u> | <u>GCCGGCTGGG</u> | <u>TGTGGCGGAC</u>  | <u>CGCTATCAGG</u>  |
| 7521 | <u>ACATAGCGTT</u> | <u>GGCTACCCGT</u>  | <u>GATATTGCTG</u> | <u>AAGAGCTTGG</u> | <u>CGGCGAATGG</u> | <u>GCTGACCGCT</u> | <u>TCCTCGTGCT</u>  | <u>TTACGGTATC</u>  |
| 7601 | <u>GCCGCTCCCG</u> | <u>ATTTCGCAGCG</u> | <u>CATCGCCTTC</u> | <u>TATCGCCTTC</u> | <u>TTGACGAGTT</u> | <u>CTTCTGAGGT</u> | <u>ACCTTTAAGA</u>  | <u>CCAATGACTT</u>  |
| 7681 | <u>ACAAGGCAGC</u> | <u>TGTAGATCTT</u>  | <u>AGCCACTTTT</u> | <u>TAAAAGAAAA</u> | <u>GGGGGGACTG</u> | <u>GAAGGGCTAA</u> | <u>TTCACTCCCA</u>  | <u>ACGAAGACAA</u>  |
| 7761 | <u>GATCTGCTTT</u> | <u>TTGCTTGTAC</u>  | <u>TGGGTCTCTC</u> | <u>TGGTTAGACC</u> | <u>AGATCTGAGC</u> | <u>CTGGGAGCTC</u> | <u>TCTGGCTAAC</u>  | <u>TAGGGAACCC</u>  |
| 7841 | <u>ACTGCTTAAG</u> | <u>CCTCAATAAA</u>  | <u>GCTTGCCCTG</u> | <u>AGTGCTTCAA</u> | <u>GTAGTGTGTG</u> | <u>CCCGTCTGTT</u> | <u>GTGTGACTCT</u>  | <u>GGTAACTAGA</u>  |
| 7921 | <u>GATCCCTCAG</u> | <u>ACCCTTTTAG</u>  | <u>TCAGTGTGGA</u> | <u>AAATCTCTAG</u> | <u>CAGTAGTAGT</u> | <u>TCATGTCATC</u> | <u>TTATTATTCA</u>  | <u>GTATTTATAA</u>  |
| 8001 | <u>CTTGCAAAGA</u> | <u>AATGAATATC</u>  | <u>AGAGAGTGAG</u> | <u>AGGAACCTGT</u> | <u>TTATTGCAGC</u> | <u>TTATAATGGT</u> | <u>TACAAATAAA</u>  | <u>GCAATAGCAT</u>  |
| 8081 | <u>CACAAATTTT</u> | <u>ACAAATAAAG</u>  | <u>CATTTTTTTT</u> | <u>ACTGCATTCT</u> | <u>AGTTGTGGTT</u> | <u>TGTCCAAACT</u> | <u>CATCAATGTA</u>  | <u>TCTTATCATG</u>  |
| 8161 | <u>TCTGGCTCTA</u> | <u>GCTATCCCGC</u>  | <u>CCCTAACTCC</u> | <u>GCCCATCCCG</u> | <u>CCCTAACTC</u>  | <u>CGCCAGTTTC</u> | <u>CGCCCATTTT</u>  | <u>CCGCCCATG</u>   |
| 8241 | <u>GCTGACTAAT</u> | <u>TTTTTTTATT</u>  | <u>TATGCAGAGG</u> | <u>CCGAGGCCGC</u> | <u>CTCGGCCTCT</u> | <u>GAGCTATTCC</u> | <u>AGAAGTAGTG</u>  | <u>AGGAGGCTTT</u>  |
| 8321 | <u>TTTGGAGGCC</u> | <u>TAGGGACGTA</u>  | <u>CCCAATTCGC</u> | <u>CCTATAGTGA</u> | <u>GTCGTATTAC</u> | <u>GCGCGCTCAC</u> | <u>TGGCCGTCGT</u>  | <u>TTTACAACGT</u>  |
| 8401 | <u>CGTGAAGTGG</u> | <u>AAAACCTTGG</u>  | <u>CGTTACCCAA</u> | <u>CTTAATCGCC</u> | <u>TTGCAGCACA</u> | <u>TCCCCCTTTC</u> | <u>GCCAGCTGGC</u>  | <u>GTAATAGCGA</u>  |
| 8481 | <u>AGAGGCCCGC</u> | <u>ACCGATCGCC</u>  | <u>CTTCCCAACA</u> | <u>GTTGCGCAGC</u> | <u>CTGAATGGCG</u> | <u>AATGGGACGC</u> | <u>GCCCTGTAGC</u>  | <u>GGCGCATTA</u>   |
| 8561 | <u>GCGCGGCGGG</u> | <u>TGTGGTGGTT</u>  | <u>ACGCGCAGCG</u> | <u>TGACCGCTAC</u> | <u>ACTTGCCAGC</u> | <u>GCCCTAGCGC</u> | <u>CCGCTCCTTT</u>  | <u>CGCTTCTTTC</u>  |
| 8641 | <u>CCTTCCTTTT</u> | <u>TCGCCACGTT</u>  | <u>CGCCGGCTTT</u> | <u>CCCCGTCAAG</u> | <u>CTCTAAATCG</u> | <u>GGGGTCCCTT</u> | <u>TTAGGGTTCC</u>  | <u>GATTTAGTGC</u>  |

```

8721 TTTACGGCAC CTCGACCCCA AAAAATTGA TTAGGGTGAT GGTTCACGTA GTGGGCCATC GCCCTGATAG ACGGTTTTTC
8801 GCCCTTTGAC GTTGGAGTCC ACGTTCCTTA ATAGTGGACT CTTGTTCCAA ACTGGAACAA CACTCAACCC TATCTCGGTC
8881 TATTCTTTTG ATTTATAAGG GATTTTGCCG ATTTCGGCCT ATTGGTTAAA AAATGAGCTG ATTTAACAAA AATTTAACGC
8961 GAATTTTAAC AAAATATTAA CGCTTACAAT TTAGGTGGCA CTTTTCGGGG AAATGTGCGC GGAACCCCTA TTTGTTTATT
9041 TTTCTAAATA CATTCAAATA TGTATCCGCT CATGAGACAA TAACCCTGAT AAATGCTTCA ATAATATTGA AAAAGGAAGA
9121 GTATGAGTAT TCAACATTTT CGTGTGCGCC TTATTCCCTT TTTTGCGGCA TTTTGCCTTC CTGTTTTTGC TCACCCAGAA
9201 ACGCTGGTGA AAGTAAAAGA TGCTGAAGAT CAGTTGGGTG CACGAGTGGG TTACATCGAA CTGGATCTCA ACAGCGGTAA
9281 GATCCTTGAG AGTTTTTCGCC CCGAAGAACG TTTTCCAATG ATGAGCACTT TTAAAGTTCT GCTATGTGGC GCGGTATTAT
9361 CCCGTATTGA CGCGGGGCAA GAGCAACTCG GTCGCCGAT ACACTATTCT CAGAATGACT TGGTTGAGTA CTCACCAGTC
9441 ACAGAAAAGC ATCTTACGGA TGGCATGACA GTAAGAGAAT TATGCAGTGC TGCCATAACC ATGAGTGATA ACACTGCGGC
9521 CAACTTACTT CTGACAACGA TCGGAGGACC GAAGGAGCTA ACCGCTTTTT TGCACAACAT GGGGGATCAT GTAACTCGCC
9601 TTGATCGTTG GGAACCGGAG CTGAATGAAG CCATACCAAA CGACGAGCGT GACACCACGA TGCCTGTAGC AATGGCAACA
9681 ACGTTGCGCA AACTATTAAC TGGCGAACTA CTTACTCTAG CTCCCGGCA ACAATTAATA GACTGGATGG AGGCGGATAA
9761 AGTTGCAGGA CCACTTCTGC GCTCGGCCCT TCCGCTGGC TGGTTTATTG CTGATAAATC TGGAGCCGGT GAGCGTGGGT
9841 CTCGCGGTAT CATTCAGCA CTGGGGCCAG ATGGTAAGCC CTCCCGTATC GTAGTTATCT ACACGACGGG GAGTCAGGCA
9921 ACTATGGATG AACGAAATAG ACAGATCGCT GAGATAGGTG CCTCACTGAT TAAGCATTGG TAACTGTGAG ACCAAGTTTA
10001 CTCATATATA CTTTAGATTG ATTTAAAACT TCATTTTAA TTTAAAAGGA TCTAGGTGAA GATCCTTTTT GATAATCTCA
10081 TGACCAAAAT CCCTTAACGT GAGTTTTCGT TCCACTGAGC GTCAGACCCC GTAGAAAAGA TCAAAGGATC TTCTTGAGAT
10161 CCTTTTTTTC TGCGCGTAAT CTGCTGCTTG CAAACAAAAA AACCACCGCT ACCAGCGGTG GTTTGTTTGC CGGATCAAGA
10241 GCTACCAACT CTTTTTCCGA AGGTAACCTG CTTCAGCAGA GCGCAGATAC CAAATACTGT TCTTCTAGTG TAGCCGTAGT
10321 TAGGCCACCA CTTCAAGAAC TCTGTAGCAC CGCCTACATA CCTCGCTCTG CTAATCCTGT TACCAGTGGC TGCTGCCAGT
10401 GCGGATAAGT CGTGTCTTAC CGGGTTGGAC TCAAGACGAT AGTTACCGGA TAAGGCGCAG CGGTCGGGCT GAACGGGGGG
10481 TTCGTGCACA CAGCCCAGCT TGGAGCGAAC GACCTACACC GAACTGAGAT ACCTACAGCG TGAGCTATGA GAAAGCGCCA
10561 CGCTTCCCGA AGAGAGAAAG GCGGACAGGT ATCCGGTAAG CGGCAGGGTC GGAACAGGAG AGCGCACGAG GGAGCTTCCA
10641 GGGGGAAACG CCTGGTATCT TTATAGTCCT GTCGGGTTTC GCCACCTCTG ACTTGAGCGT CGATTTTTGT GATGCTCGTC
10721 AGGGGGGCGG AGCCTATGGA AAAACGCCAG CAACGCGGCC TTTTACGGT TCCTGGCCTT TTGCTGGCCT TTTGCTCACA
10801 TGTTCTTTCC TGCGTTATCC CCTGATTCTG TGGATAACCG TATTACCGCC TTTGAGTGAG CTGATACCGC TCGCCGAGC
10881 CGAACGACCG AGCGCAGCGA GTCAGTGAGC GAGGAAGCGG AAGAGCGCCC AATACGCAA CCGCTCTCC CCGCGCGTTG
10961 GCCGATTCAT TAATGCAGCT GGCACGACAG GTTTCCCGAC TGGAAGCGG GCAGTGAGCG CAACGCAATT AATGTGAGTT
11041 AGCTCACTCA TTAGGCACCC CAGGCTTTAC ACTTTATGCT TCCGCTCGT ATGTTGTGTG GAATTGTGAG CGGATAACAA
11121 TTTCACACAG GAAACAGCTA TGACCATGAT TACGCCAAGC GCGCAATTAA CCCTCACTAA AGGGAACAAA AGCTGGAGCT
11201 GCAAGCTT

```
